# Supplementary material for: Recombination machinery engineering facilitates metabolic engineering of the industrial yeast Pichia pastoris
Source: PubMed Central journal article supplement — Nucleic Acids Res. 2021 Jul 1;49(13):7791–805. doi: 10.1093/nar/gkab535 (PMC8287956; doi:10.1093/nar/gkab535), 2021-07-01
Supplement: gkab535_supplemental_file.pdf [file gkab535_supplemental_file.pdf]

1 **Supporting information for**

2  
3 **Recombination machinery engineering facilitates metabolic**  
4 **engineering of the industrial yeast *Pichia pastoris***

5  
6 Peng Cai<sup>1,5,#</sup>, Xingpeng Duan<sup>1,3,#</sup>, Xiaoyan Wu<sup>1,3,4</sup>, Linhui Gao<sup>1,3,4</sup>, Min Ye<sup>1,3,4</sup>, Yongjin J.  
7 Zhou<sup>1,2,3,6</sup>

8  
9 <sup>1</sup> Division of Biotechnology, Dalian Institute of Chemical Physics, Chinese Academy of  
10 Sciences, Dalian 116023, China

11 <sup>2</sup> CAS Key Laboratory of Separation Science for Analytical Chemistry, Dalian Institute of  
12 Chemical Physics, Chinese Academy of Sciences, Dalian 116023, China

13 <sup>3</sup>Dalian Key Laboratory of Energy Biotechnology, Dalian Institute of Chemical Physics,  
14 Chinese Academy of Sciences, Dalian 116023, China

15 <sup>4</sup>University of Chinese Academy of Sciences, Beijing 100049, China

16 <sup>5</sup>School of Bioengineering, Dalian University of Technology,

17 <sup>6</sup> www.synbc.dicp.ac.cn

18 #These authors contribute equally to this work

19 \*Correspondence to: Yongjin J. Zhou.

20 E-mail: zhouyongjin@dicp.ac.cn

21  
22  
23  
24  
25 **This PDF file includes:**

26 Figures S1 to S12

27  
28 Tables S1 to S4

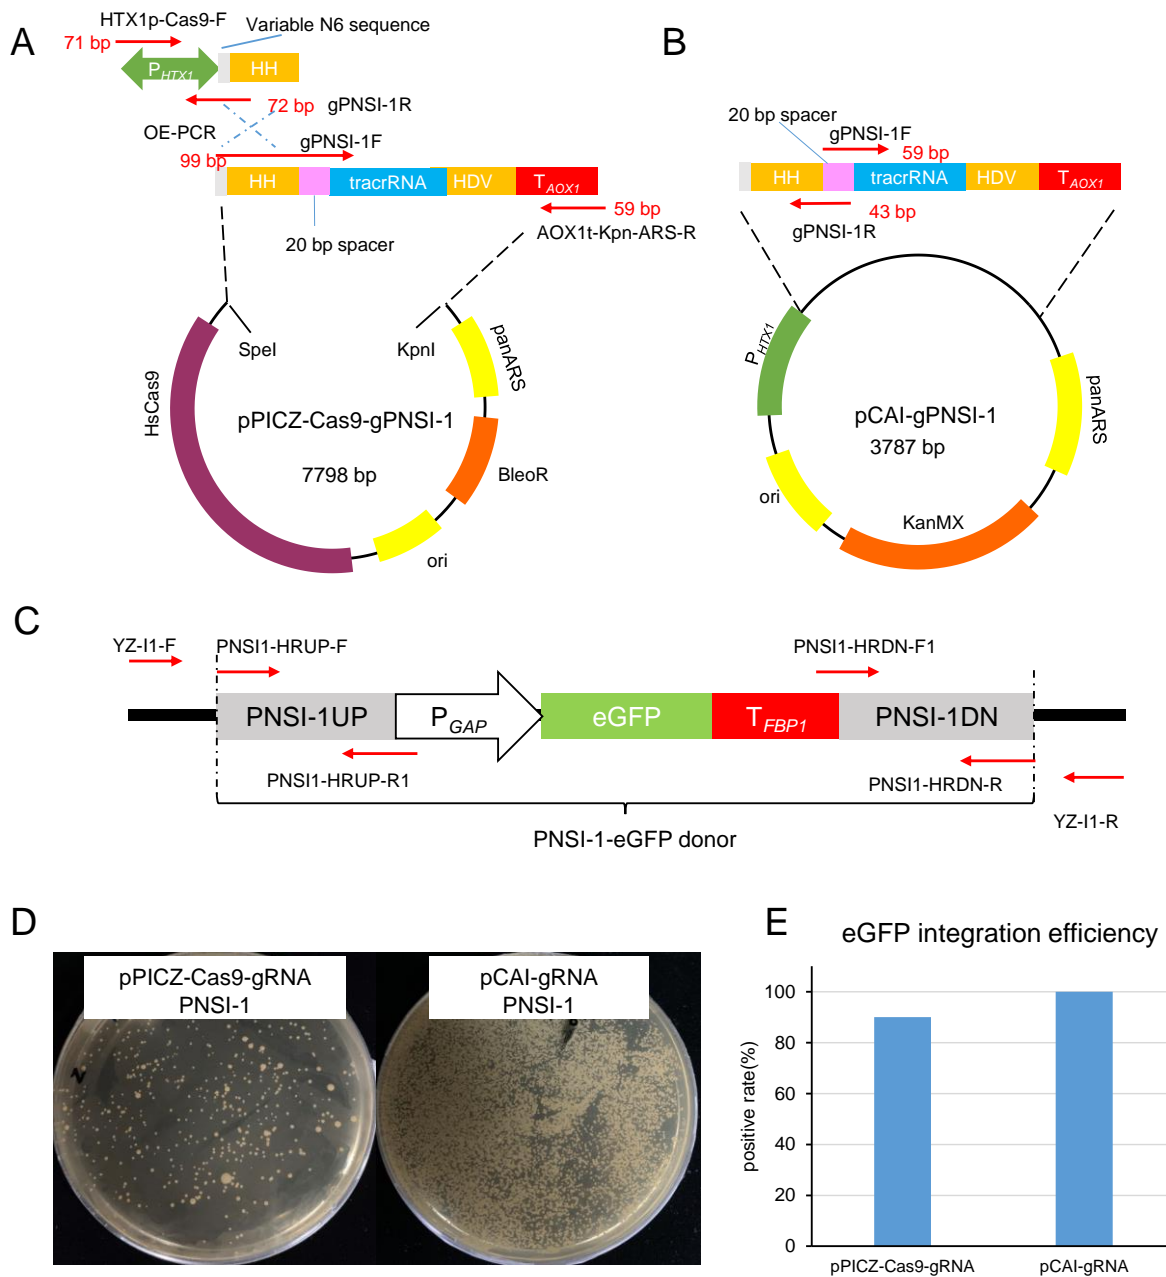

33

34 **Supplementary Fig S1. Establishing and optimizing CRISPR-Cas9 systems for *P. pastoris*.** The

35 PNSI-1 site was used as an example to introduce the CRISPR-Cas9 system, which can be applied

36 to any neutral site. (A) The first version of Cas9-gRNA plasmid was constructed according to a

37 previous report (11, 14). The gRNA is flanked by 5' and 3' self-processing RNA elements to

38 obtain correctly processed gRNAs. HH part is the 5' ribozyme cleaving sequence. This strategy

39 required the alteration of a short 6 bp sequence of the 5' cleaving HH ribozyme reverse

40 complement to the first 6 bps of gRNA (N6 variable sequences). In detail, primers HTX1p-Cas9-

41 F/ gPNSI-1R, gPNSI-1F/ AOX1t-Kpn-ARS-R were used to amplify the P<sub>HTX1</sub> and sgRNA parts.

42 Then, the two parts were fused by overlap extension PCR and cloned into the plasmid

43 backbone by the Gibson Assembly cloning method. Primers of 301 bp (about \$73) were used  
44 to construct the Cas9-gRNA plasmid. (B) Simplified gRNA plasmid construction (right). Primer  
45 pair pCAI-gPNSI-1F/pCAI-gPNSI-1R was used to mutate the 20 bp target sequence directly in  
46 plasmid with 15 cycles of PCR. Primers of 102 bp (about \$15) were used in the construction of  
47 the simplified gRNA plasmid. In addition, there was no need for overlap extension PCR or gel  
48 extraction procedures. (C) An eGFP expression cassette was used as an integration donor at  
49 the PNSI-1 site. Primer pairs PNSI-HRUP-F/PNSI-HRUP-R1 and PNSI-HRDN-R1/PNSI-HRDN-R  
50 were used to amplify the upstream and downstream homologous arms. YZ-I1-F/YZ-I1-R were  
51 used for colony PCR. (D) The transformants on plates. (E) For pPICZ-Cas9-gPNSI-1 plasmid, the  
52 positive rate was about 90% (9/10), and the positive rate of pCAI-gPNSI-1 was 100% (10/10).  
53

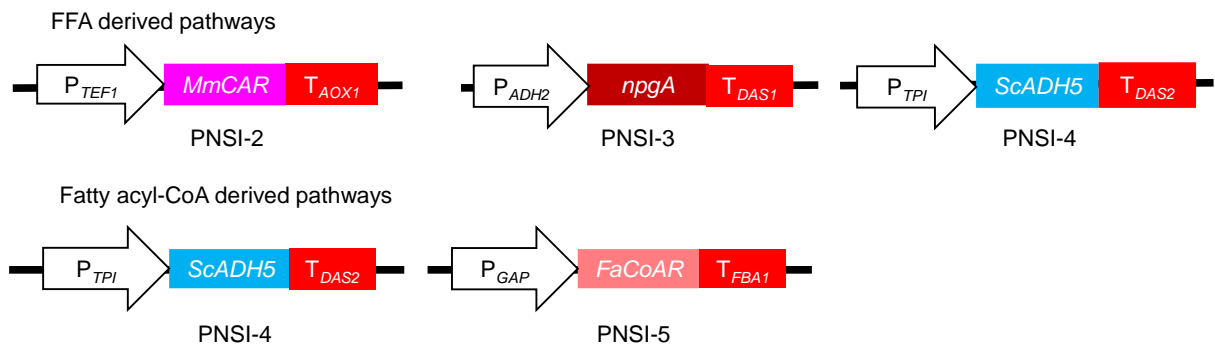

54

55

56

57

**Supplementary Fig S2. Fatty alcohol biosynthetic pathway construction.** The scheme of DNA organization of FFA derived pathway and fatty acyl-CoA derived pathways in separate neutral sites. Each gene with 1 kb HA was integrated into one neutral site.

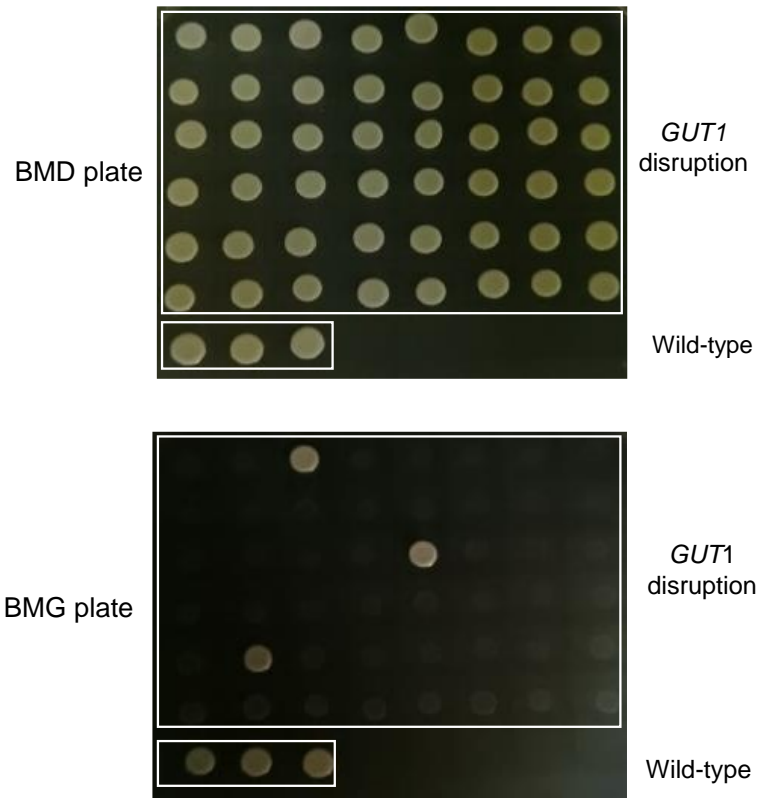

58

59 **Supplementary Fig S3. Phenotypic statistics were used to characterize the targeting**  
60 **efficiency of *GUT1*-gRNA without donor.** 48 random transformants were transferred to  
61 minimal media agar plates with either glucose (BMD) or glycerol (BMG) as carbon source. It  
62 has been reported that *GUT1* disruption cutting by Cas9 result a growth defect on BMG plate  
63 (Weninger et al., J. Biotechnol., 2016, 235,139–149, doi: 10.1016/j.jbiotec.2016.03.027).  
64

65

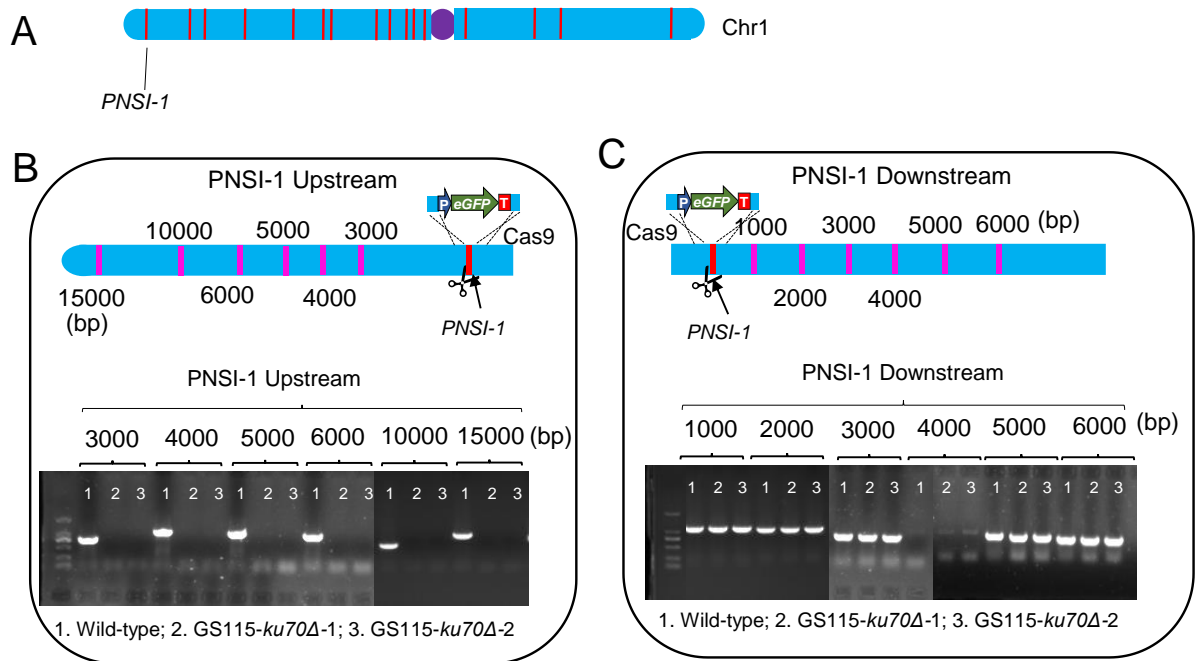

66

67 **Supplementary Fig S4. The *KU70* deletion caused the loss of a large chromosomal fragment**  
68 **after genome integration of an eGFP cassette.**

69 (A) The localization of the PNSI-1 site in the genome of *P. pastoris*, which was used for genome  
70 integration of an eGFP cassette with the aid of Cas9/gRNA system. 1 kb homologous arm was  
71 used to construct the eGFP expression cassette. (B) PCR analysis of fragments located  
72 upstream of PNSI-1 site after the genome cutting by Cas9. The top is the scheme of the  
73 location of primer binding sites and PNSI-1, and the bottom is electrophoretic analysis of PCR  
74 products upstream of PNSI-1 site after CRISPR/Cas9 editing. (C) PCR analysis of fragments  
75 located downstream of PNSI-1 site after the genome cutting by Cas9. The top is the scheme  
76 of the location of primer binding sites and PNSI-1, and the bottom is electrophoretic analysis  
77 of PCR products downstream of PNSI site after CRISPR/Cas9 editing. The failure to detect  
78 corresponding fragments in *KU70* deletion strains (electrophoretic band 2 and 3) suggested  
79 the loss of a large chromosomal fragment in the left-hand side of chromosome 1.

80

81

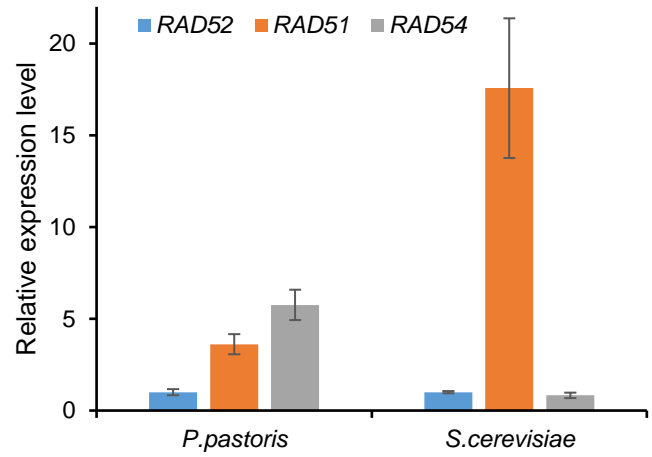

82  
83  
84  
85  
86  
87

**Supplementary Fig S5. Relative expression level of RAD family genes in *P. pastoris* and *S. cerevisiae*.** Actin gene was chosen as the endogenous reference gene, and the data analysis was conducted by the method of  $2^{-\Delta\Delta C_T}$ . Relative expression level of these genes was calculated by normalized the expression level of RAD52 in the respective strains.

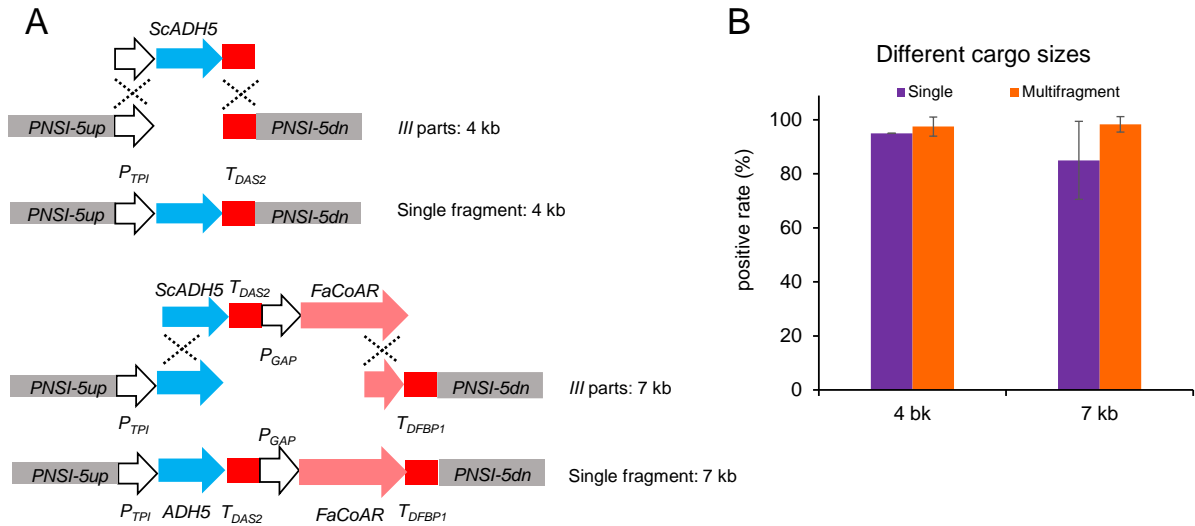

88  
89  
90  
91  
92  
93  
94

**Supplementary Fig S6. Comparison of a single fragment with that of multiple fragments for different cargo sizes at a single site.** (A) The scheme of integration with different donor size and repair mode. Single fragment and three fragments integration with 1 kb HA were compared at PNSI-5 site. (B) Positive rates in integrating various cargo sizes of expression cassettes via different repair mode.



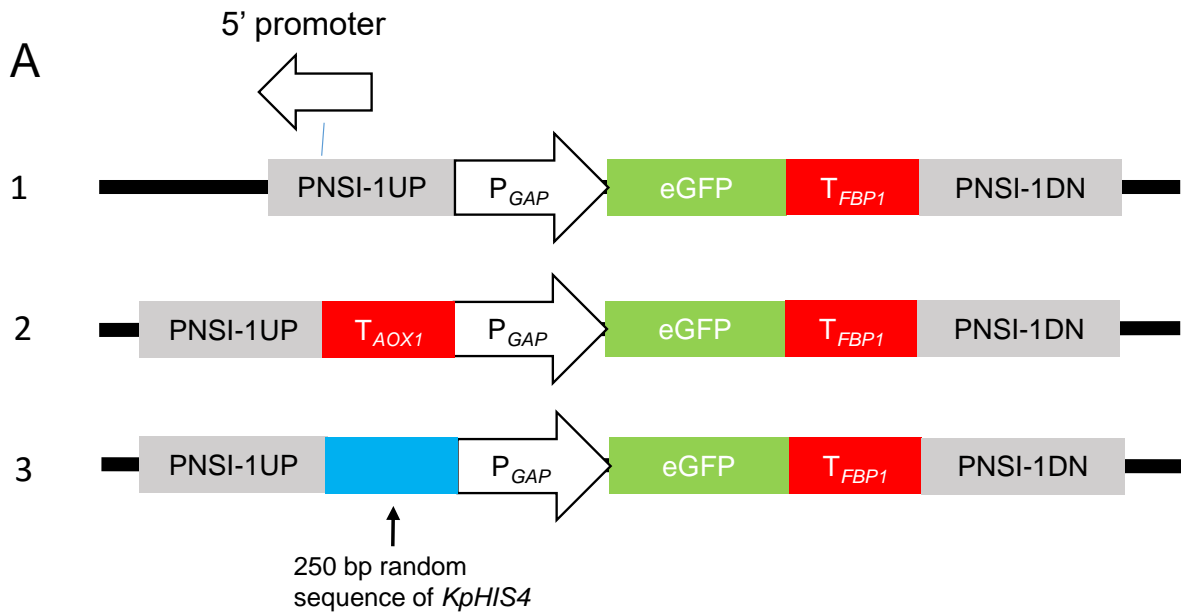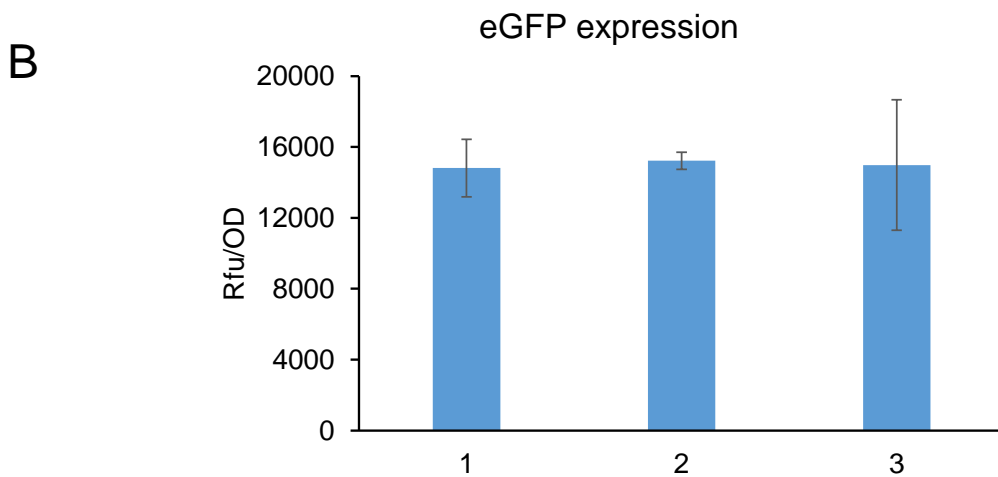

97  
98 **Supplementary Fig S7.** Influence of 5' upstream sequence on gene expression at neutral site.  
99 (A) The scheme of 5' sequences localization to the upstream of  $P_{GAP}$ . (B) The fluorescence  
100 intensity was the same for all integrations, which suggested that the small upstream fragment  
101 did not affect promoter strength. All data represent the mean  $\pm$  s.d. of three yeast clones  
102  
103

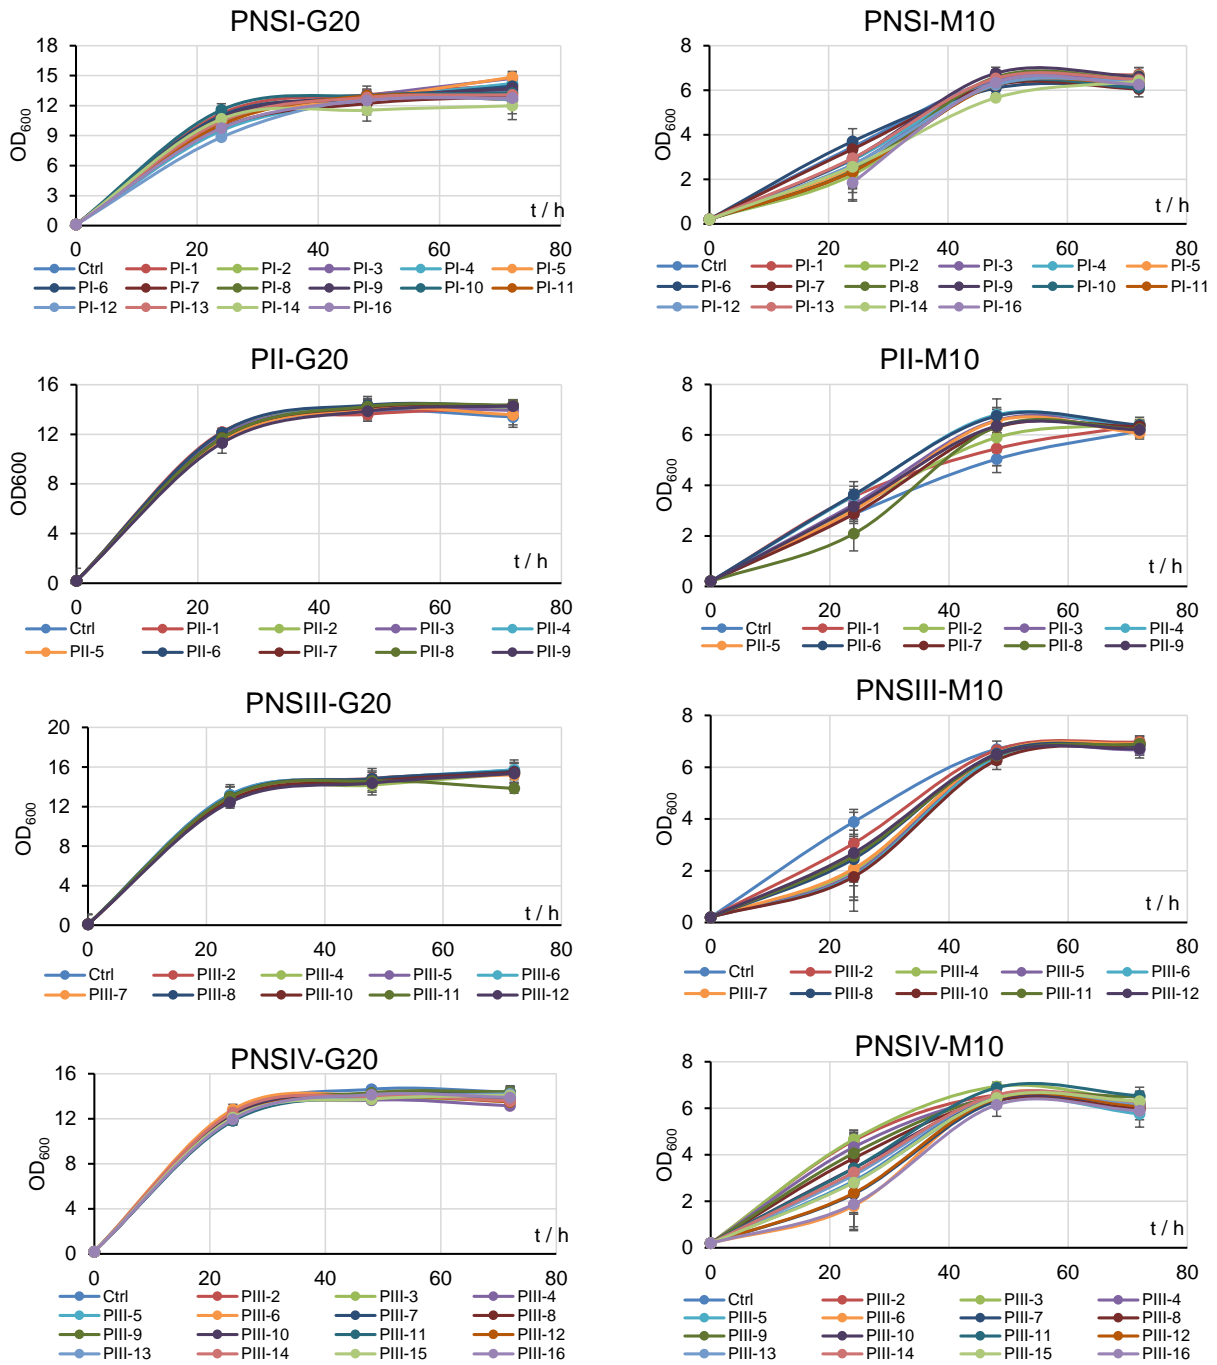

105

106 **Supplementary Fig S8. Cell growth of eGFP integrated strains at different neutral sites. G20**  
 107 means Deft-His-20 g/L glucose medium. M10 means Deft-His-10 g/L MeOH medium. In G20  
 108 medium, cell growth was the same for control strain PC110 or PC111 during the entire phase.  
 109 In M10 medium, OD600 varied at logarithmic growth period due to the weaker methanol  
 110 utilization capacity. Biomass reached the same level at 48h when cell growth entered a  
 111 plateau phase. All data represent the mean±s.d. of three yeast clones

112

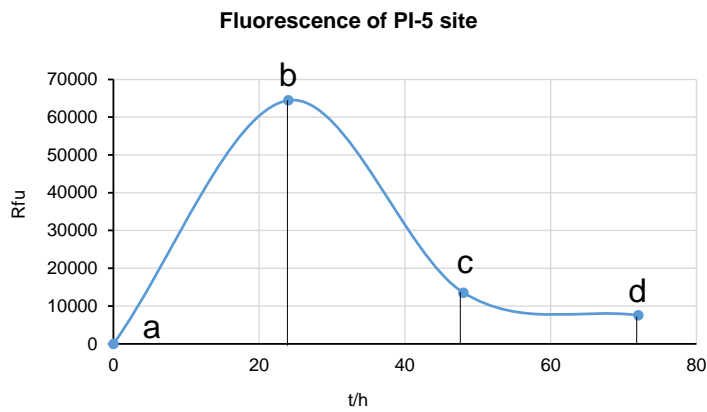

$$S = F(X) = \int_{t_0}^t f(x) * dt \approx \frac{(a + b)}{2} * 24 + \frac{(b + c)}{2} * 24 + \frac{(c + d)}{2} * 24$$

114

115

116

117

118

119

120

121

122

123

124

**Supplementary Fig S9. Total fluorescence intensity was calculated by the integral of fluorescence intensity with time.** The total fatty alcohols were accumulated by enzymatic (FacoAR) biosynthesis of fatty alcohols, in other word, it was positive correlated with the integral of FacoAR activity. We thus investigated the possible correlation of fluorescence intensity integral with the fatty alcohol titers. Total fluorescence intensity can be roughly calculated by the bottom equation that based on the fluorescence intensity measured at 24h, 48 h and 72 h. The half-life of eGFP protein was about 7-12 h which means the area of the integral is approximately equal to total fluorescence intensity.

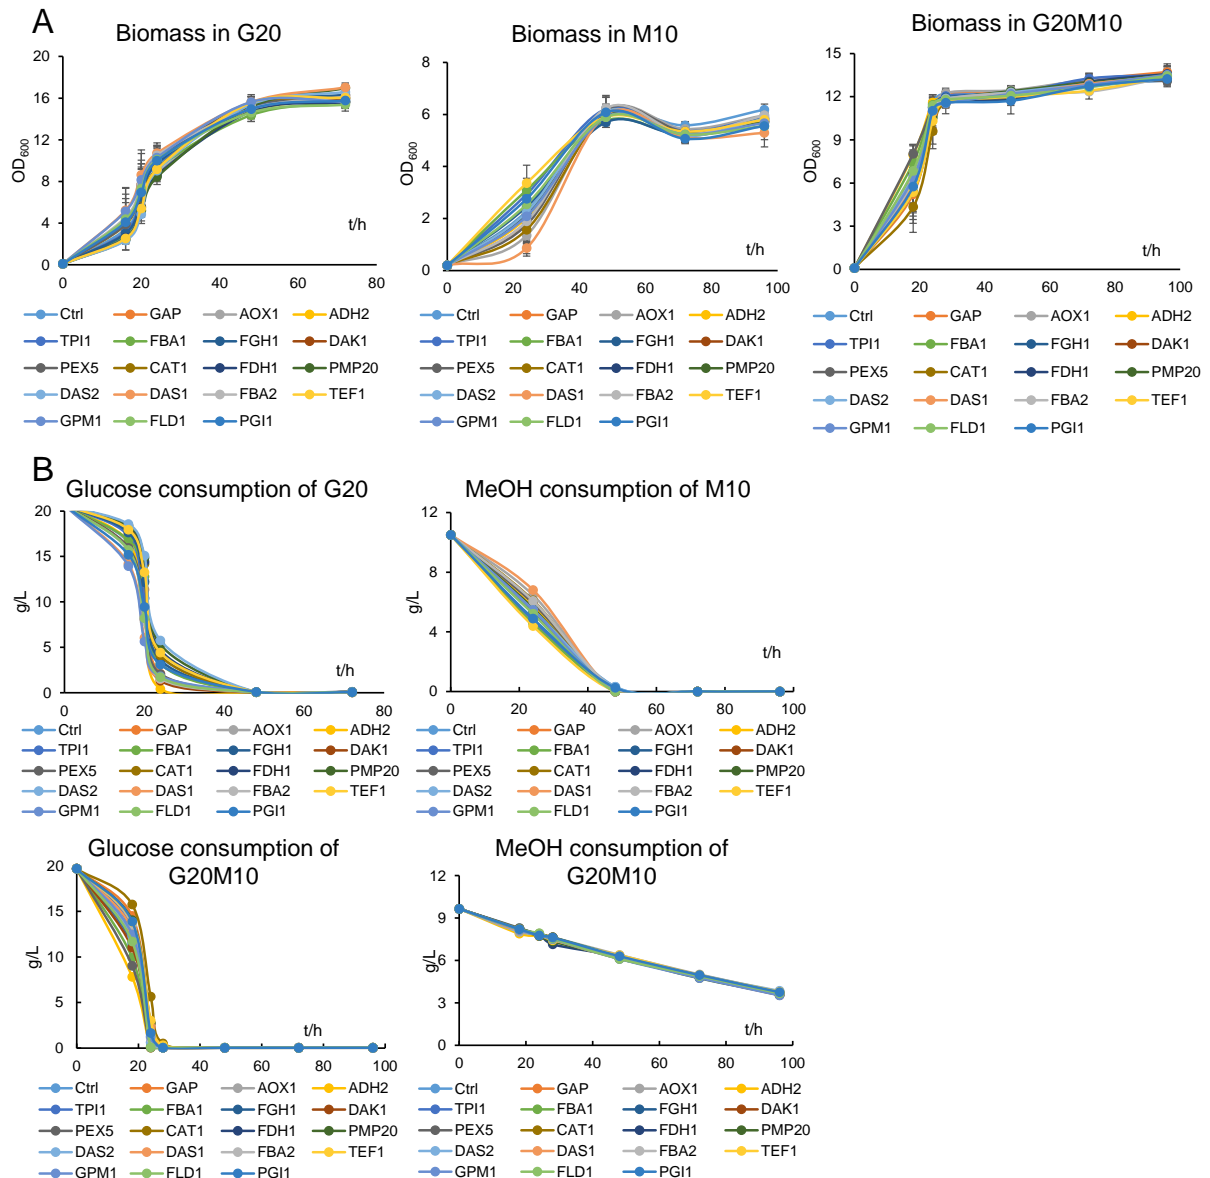

125

126 **Supplementary Fig S10. The cell growth and consumption of carbon sources of various**  
 127 **strains harboring integrating eGFP expression cassettes driven by different promoters.**

128 (A) The cell growth curves. Recombinant strains were cultured in minimal medium with  
 129 different carbon source. Yeast cell growth into plateau stage after 24 hours when glucose was  
 130 used as carbon source, and the stationary phase was extended to 48 h when MeOH as the  
 131 carbon source. (B) Glucose was depleted after about 24 hours' cultivation both in G20 or  
 132 G20M10 medium. It took 48 hours for methanol to be fully consumed when it was used as  
 133 unique carbon source. Since the metabolism of methanol is severely inhibited by glucose,  
 134 there were still 4 g/L methanol in medium till the end of cultivation in G20M10 media. All data  
 135 represent the mean  $\pm$  s.d. of three yeast clones

136

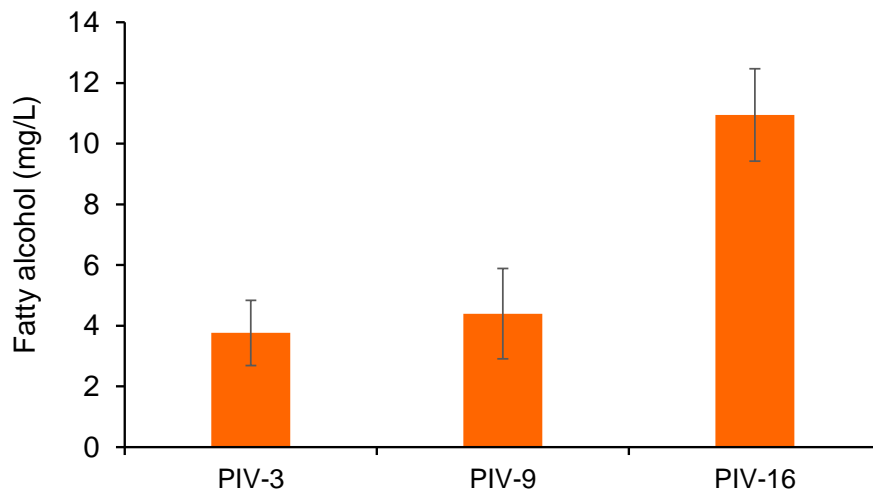

137

138 **Supplementary Fig S11. Fatty alcohol production by using methanol as a sole carbon source.**

139 The fatty alcohol producing strains were cultivated in Delft media with 10 g/L methanol as a

140 sole carbon source. All data represent the mean $\pm$ s.d. of three yeast clones.

141

142

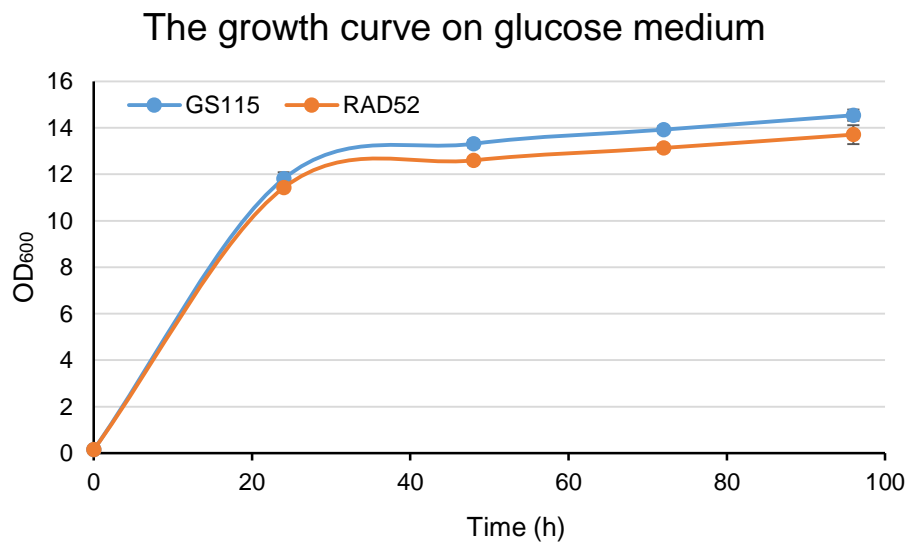

143

144

145

146

147

**Supplementary Fig S12. The growth curve of wild type and *RAD52* overexpressed strains on Deft-medium with 20 g/L glucose.** The initial inoculation of OD<sub>600</sub> was 0.15, and the cell growth was analyzed by sampling every 24 hours.

148 **Supplementary Table S1 Strains list**

| Strain name | Genotype                                                                                                                                                                                                                                                 | Resource or Reference |
|-------------|----------------------------------------------------------------------------------------------------------------------------------------------------------------------------------------------------------------------------------------------------------|-----------------------|
| GS115       | Mut+, <i>his4</i> -, <i>AOX1</i> , <i>AOX2</i>                                                                                                                                                                                                           | From Pro Cai          |
| PC110       | GS115, <i>HIS4</i> :: <i>P<sub>GAP</sub>-PpRAD52-T<sub>AOX1</sub></i>                                                                                                                                                                                    | This study            |
| PC111       | PC110, <i>PNSI-2</i> :: <i>P<sub>GAP</sub>-hCas9-T<sub>DAS1</sub></i>                                                                                                                                                                                    | This study            |
| PC139       | PC110, <i>hfd1Δ</i> , <i>faa1Δ</i> , <i>PNSI-2</i> :: <i>P<sub>TEF1</sub>-MmCAR-PpOptR1-T<sub>AOX1</sub></i> , <i>PNSI-3</i> :: <i>P<sub>ADH2</sub>-npgA-PpOptR1-T<sub>DAS1</sub></i> , <i>PNSI-4</i> :: <i>P<sub>TP11</sub>-ScADH5-T<sub>DAS2</sub></i> | This study            |
| PC204       | PC110, <i>hfd1Δ</i> , <i>PNSI-4</i> :: <i>P<sub>TP11</sub>-ScADH5-T<sub>DAS2</sub></i> , <i>PNSI-5</i> :: <i>P<sub>GAP</sub>-FaCoAR-PpOptR1-T<sub>FBP1</sub></i>                                                                                         | This study            |
| XPD02       | GS115, <i>HIS4</i> :: <i>P<sub>ADH2</sub>-PpRAD52-T<sub>AOX1</sub></i>                                                                                                                                                                                   | This study            |
| XPD03       | GS115, <i>HIS4</i> :: <i>P<sub>GAP</sub>-ScRAD51-T<sub>AOX1</sub></i>                                                                                                                                                                                    | This study            |
| XPD04       | GS115, <i>HIS4</i> :: <i>P<sub>GAP</sub>-ScRAD52-T<sub>AOX1</sub></i>                                                                                                                                                                                    | This study            |
| XPD05       | GS115, <i>HIS4</i> :: <i>P<sub>GAP</sub>-ScRAD54-T<sub>AOX1</sub></i>                                                                                                                                                                                    | This study            |
| XPD06       | GS115, <i>HIS4</i> :: <i>P<sub>GAP</sub>-ScSAE2-T<sub>AOX1</sub></i>                                                                                                                                                                                     | This study            |
| XPD07       | GS115, <i>HIS4</i> :: <i>P<sub>GAP</sub>-PpRAD51-T<sub>AOX1</sub></i>                                                                                                                                                                                    | This study            |
| XPD08       | GS115, <i>HIS4</i> :: <i>P<sub>GAP</sub>-PpRAD54-T<sub>AOX1</sub></i>                                                                                                                                                                                    | This study            |
| XPD11       | PC110, <i>mph1Δ</i>                                                                                                                                                                                                                                      | This study            |
| XPD12       | PC110, <i>sgs1Δ</i>                                                                                                                                                                                                                                      | This study            |
| XPD13       | PC110, <i>top3Δ</i>                                                                                                                                                                                                                                      | This study            |
| XPD14       | PC110, <i>rmi1Δ</i>                                                                                                                                                                                                                                      | This study            |
| XPD15       | PC110, <i>PNSI-1</i> :: <i>P<sub>GAP</sub>-PpMUS81-T<sub>FBP1</sub>+T<sub>ADH2</sub>-PpMMS4-P<sub>TEF1</sub></i>                                                                                                                                         | This study            |
| XPD16       | PC110, <i>PNSI-1</i> :: <i>P<sub>GAP</sub>-PpSLX1-T<sub>FBP1</sub>+T<sub>ADH2</sub>-PpSLX4-P<sub>TEF1</sub></i>                                                                                                                                          | This study            |
| XPD17       | PC110, <i>PNSI-1</i> :: <i>P<sub>GAP</sub>-PpYEN1-T<sub>FBP1</sub></i>                                                                                                                                                                                   | This study            |
| XPD18       | XPD11, <i>sgs1Δ</i>                                                                                                                                                                                                                                      | This study            |
| XPD19       | XPD11, <i>top3Δ</i>                                                                                                                                                                                                                                      | This study            |
| XPD20       | XPD11, <i>rmi1Δ</i>                                                                                                                                                                                                                                      | This study            |
| XPD21       | XPD11, <i>PNSI-1</i> :: <i>P<sub>GAP</sub>-PpMUS81-T<sub>FBP1</sub>+T<sub>ADH2</sub>-PpMMS4-P<sub>TEF1</sub></i>                                                                                                                                         | This study            |
| XPD22       | XPD11, <i>PNSI-1</i> :: <i>P<sub>GAP</sub>-PpSLX1-T<sub>FBP1</sub>+T<sub>ADH2</sub>-PpSLX4-P<sub>TEF1</sub></i>                                                                                                                                          | This study            |
| XPD23       | XPD11, <i>PNSI-1</i> :: <i>P<sub>GAP</sub>-PpSLX1-T<sub>FBP1</sub></i>                                                                                                                                                                                   | This study            |

149

150  
151

**Supplementary Table S2. Primer list**

| No  | Primer name                 | Sequence 5'-3'                                                                                                               |
|-----|-----------------------------|------------------------------------------------------------------------------------------------------------------------------|
| P1  | Cas9-F                      | cgaaacgATGGACAAGAAGTACTCCATTGGG                                                                                              |
| P2  | Cas9-R                      | TTAAACTTTTCTTTCTTCTTTGG                                                                                                      |
| P3  | panARS-F                    | CGggatccGCAACATCTTTGGATAATATCAGAATGAGAAAAG                                                                                   |
| P4  | panARS-R                    | GccttagaTAGTGCTGATTATGATTTGACGTTTATATACATG                                                                                   |
| P5  | HTX1-F                      | GTTTCGTCCTCACGGACTCATCAGTGCAAT TTTGATTTGTTTAGGTAACCTGAACTG                                                                   |
| P6  | HTX1-R                      | AATGGAGTACTTCTTGCCATCGTTTTCG TGTTGTAGTTTTAATATAGTTTGAGTATGAG                                                                 |
| P7  | H-F                         | ATTGCACTGATGAGTCCGTGAGGAC                                                                                                    |
| P8  | H-R                         | GTCCCATTCGCCATGCCGAAG                                                                                                        |
| P9  | M1                          | TTTTCAAGTTGATAACGGACTAGCCTTATTTAACTTGCTATTTCTAGCTCTAAAACGCCTGGCTGAGGAAATTGCAGACGAGCTTACTCGTTTCGTCC<br>TCACGGACTCATCAGTGCAAT  |
| P10 | M2                          | ATAAGGCTAGTCCGTTATCAACTTGAAAAAGTGGCACCGAGTCGGTGCTTTTGGCCGGCATGGTCCCAGCCTCCTCGCTGGCGCCGGCTGGGCAACA<br>TGCTTCGGCATGGCGAATGGGAC |
| P11 | T <sub>AOX1</sub> -F        | AACGTCAAATCATAATCAGCACTAGCACAAACGAAGGTCTCACTTAATC                                                                            |
| P12 | T <sub>AOX1</sub> -R        | GGCAACATGCTTCGGCATGGCGAATGGGACTCAAGAGGATGTCAGAATGCCATTTG                                                                     |
| P13 | T <sub>DAS1</sub> -F        | GCTGACCCCAAGAAGAAGAGGAAGGTGTGAACGGGAAGTCTTTACAGTTTTAGTTAG                                                                    |
| P14 | T <sub>DAS1</sub> -R        | TCTCAGCTCGGTGGAGACAGCAGGGCTGACCCA GTTAAGGGATTTTGGTCATGAGATCAGATCTGACCCTTGTGACTGACACTTTGG                                     |
| P15 | RAD52-F                     | ATGTCTTTCGATGACGCTGAGC                                                                                                       |
| P16 | RAD52-R                     | GccttagaTTAATTCGAAGCTGGAGAGTTTTTC                                                                                            |
| P17 | P <sub>GAP</sub> -F         | GTTAAGGGATTTTGGTCATGAGATCAGATCTTTTTTGTAGAAATGTCTTGGTGTCC                                                                     |
| P18 | P <sub>GAP</sub> -R         | TGCGTTTGAGCTCAGCGTCATCGAAAGACATTGTGTTTTGATAGTTGTTCAATTGATTG                                                                  |
| P19 | P <sub>ADH2</sub> -F        | TCCCCGCGGCGCAGCGTTTTCTGACGGTACTAGA                                                                                           |
| P20 | P <sub>ADH2</sub> -R        | CTCAGCGTCATCGAAAGACATTTTCGTAAGTAAATAAGATAAAAGCTAGTAGCTGATG                                                                   |
| P21 | P <sub>GAP-ScRAD51</sub> -R | CTGATATATGTTGTTCTTGAACCTTGAGACATTGTGTTTTGATAGTTGTTCAATTGATTG                                                                 |
| P22 | P <sub>GAP-ScRAD52</sub> -R | TCTTCTCATCCATATCCATAATTCATTCAATTGTGTTTTGATAGTTGTTCAATTGATTG                                                                  |



|     |                                  |                                                              |
|-----|----------------------------------|--------------------------------------------------------------|
| P23 | <i>ScRAD51-F</i>                 | ATGTCTCAAGTTCAAGAACAACATATATC                                |
| P24 | <i>ScRAD51-R</i>                 | GCTCTAGACTACTCGTCTTCTTCTGCGGGTC                              |
| P25 | <i>ScRAD52-F</i>                 | ATGAATGAAATTATGGATATGGATGAG                                  |
| P26 | <i>ScRAD52-R</i>                 | GCTCTAGATCAAGTAGGCTTGCCTGCATG                                |
| P27 | <i>PpRAD51-F</i>                 | TCAATTGAACAACATCAAAACACAATGTGCAACCATGAAGTCATAGAG             |
| P28 | <i>PpRAD51-R</i>                 | CAAATGGCATTCTGACATCCTCTTGATTAGTCATCATCCTCTCTAGGGTCC          |
| P29 | <i>PpRAD54-F</i>                 | TCAATTGAACAACATCAAAACACAATGGCAAAGAACTTCATAAACC               |
| P30 | <i>PpRAD54-R</i>                 | CAAATGGCATTCTGACATCCTCTTGACTAATGTGATATATATTGGAAACAGTAGCTG    |
| P31 | <i>pPICZA-T<sub>Aox1</sub>-F</i> | TCAAGAGGATGTCAGAATGCC                                        |
| P32 | <i>pPICZA-P<sub>GAP</sub>-R</i>  | TGTGTTTTGATAGTTGTTCAATTGATTG                                 |
| P33 | <i>5GUT1_fw</i>                  | AAATCTAGGTCATCCTACAGCAAACACC                                 |
| P34 | <i>5GUT1_rv</i>                  | GACCTAACATGATAATATAATTACAGCTGCTCGTAGAAGAAGAGTCTTTTTCAGTCCTTG |
| P35 | <i>3GUT1_fw</i>                  | CAAGGACTGAAAAAGACTCTTCTTCTACGAGCAGCTGTAATTATATTATCATGTTAGGTC |
| P36 | <i>3GUT1_rv</i>                  | AAATATAAGAGGAAACAACGTTTCGTATCGTGATC                          |
| P37 | <i>5GUT1-fw(500)</i>             | GGGTTGCGGAGCGTCAAAAG                                         |
| P38 | <i>3GUT1-rv(500)</i>             | CGCTGCCAGAGCTGTACATAC                                        |
| P39 | <i>5GUT1-fw(200)</i>             | CTCCGTGCTCCGATAATAACAGTG                                     |
| P40 | <i>3GUT1-rv(200)</i>             | CAGCCCTCTGTCAATAGTGATGG                                      |
| P41 | <i>FAA1up-F</i>                  | AGGTATCAAAGCTGATTTTTATTGCTATTGTTGATTTAC                      |
| P42 | <i>FAA1up-R</i>                  | CAATCGGCTGCTCGCTTCTTGAAGTTTTCTTTGTACGCGTGTGTTG               |
| P43 | <i>FAA1dn-F</i>                  | TTCCTTGTTGCCTTCTGAGGGAGACTAAGATGTAGTTTTTAGACTTGA             |
| P44 | <i>FAA1dn-R</i>                  | CATCCTCTCTGATGCAAGTCTCTTTG                                   |
| P45 | <i>FAA2up-F</i>                  | ACACCCAGTTTGAATAATAAAGCAGAGCTAC                              |
| P46 | <i>FAA2up-R</i>                  | CTTAGTCTCCCTCAGGAAGGCAACAAGGAAACGAGAATGGTA                   |
| P47 | <i>FAA2dn-F</i>                  | TTCCTTGTTGCCTTCTGAGGGAGACTAAGATGTAGTTTTTAGACTTGA             |
| P48 | <i>FAA2dn-R</i>                  | CATCCTCTCTGATGCAAGTCTCTTTG                                   |
| P49 | <i>KU70up-F</i>                  | TCTCACGGGTGATTACTTGTGTTAC                                    |
| P50 | <i>KU70up-R</i>                  | CCCGTTTCTCTATAAGTACTAAAGCC                                   |

|     |          |                                                                 |
|-----|----------|-----------------------------------------------------------------|
| P51 | KU70dn-F | TTGTATAGGCTTTAGTACTTATAGAGGAAACGGGTTCTGTTCCTTACTTTTTCTCGC       |
| P52 | KU70dn-R | GGATTCCGAGAGACTAGTTACGTT                                        |
| P53 | MPH1up-F | GTAAACTTGTGATGATTGGACCC                                         |
| P54 | MPH1up-R | GGGATTATTAAGGGATAGTAAGTTACTTTGTTCCATCTAAGGGTTAACGGGTTTCCAAAG    |
| P55 | MPH1dn-F | AGATGGAACAAAGTAACTTACTATCCCTTAATAATCCC                          |
| P56 | MPH1dn-R | CCTTCCTATAGTGGCTATCGAGG                                         |
| P57 | SGS1up-F | GACTTGTCAAAGTTGAGAAAGTTGGG                                      |
| P58 | SGS1up-R | AGAGTGGGAGTTGCGGAGAAAAG                                         |
| P59 | SGS1dn-F | TTAATCAACCTTTTCTCCGCACTCCCACTCTCATCTACTTCAAGGAAAGCTTCAGTTC      |
| P60 | SGS1dn-R | ATCTGAACTTTATTCGTGCAATCTTCACTG                                  |
| P61 | TOP3up-F | GTTGCTCACTGATTGACGTCTGTC                                        |
| P62 | TOP3up-R | CTAGCGATGTGATACATACACGTC                                        |
| P63 | TOP3dn-F | GAATCTTATTGACGTGTATGTATCACATCGCTAGAATTACATAGTTACCTGTGGGCCAG     |
| P64 | TOP3dn-R | TCCCCAGATAAATATCCGCCATTTG                                       |
| P65 | RMI1up-F | GTTGTTGTCGTTTCTTTTCTTCC                                         |
| P66 | RMI1up-R | AGACGGTGACCATTAACAGATTAGAG                                      |
| P67 | RMI1dn-F | AAGAACCTCTAATCTGTTAATGGTCACCGTCTGGTTCAATGCATGTCATTAAGGACAAC     |
| P68 | RMI1dn-R | CATGGTGAGGTCAATGGGTATC                                          |
| P69 | 19P-94   | TATGGTTGCTTAAGATGATAGGAGAATCAAACC                               |
| P70 | 19P-95   | GTCATATGACAAGTTGGGTAGGTTGC                                      |
| P71 | 19P-96   | TGTAGAAATGTCTTGGTGTCTCG                                         |
| P72 | 19P-97   | TGTGTTTTGATAGTTGTTCAATTGATTG                                    |
| P73 | 19P-98   | CCCTATTTCAATCAATTGAACAACATCAAAACACAATGTGTATGCCTGAGGATCAAGG      |
| P74 | 19P-99   | ACCCCATGTCTGGAATATTTTTTCG                                       |
| P75 | 19P-100  | TGCGTTCGATTGGCACTGTTTC                                          |
| P76 | 19P-101  | TCTTCCAGATCTAGCGACTCTGGCAGATAAGACGCGAACCTTACTTTTCTATTATCCC      |
| P77 | 19P-102  | CATCATAGGGATAATAGAAAAGTAAGGTTCCGCTTATCTGCCAGAGTCGCTAGATC        |
| P78 | 19P-103  | GCCGAATAGTTTGTATACGTCTTATGTAATG                                 |
| P79 | 19P-104  | CATTACATAAGACGTATACAACTATTCCGGCTTAATTTATCAACTCGTTTGGGTTGTCACACG |

|      |         |                                                                  |
|------|---------|------------------------------------------------------------------|
| P80  | 19P-105 | ATTCTACTACATACATTTTAGTTATTCGCCAACATGAGTCTCAATTGTGGTGATTCTG       |
| P81  | 19P-106 | GTTGGCGAATAACTAAAATGTATGTAGTGAG                                  |
| P82  | 19P-107 | CCTTTTTATGTCAAGTCCGCGTCCCAACTTGCTTATAACTGTCGCCTCTTTTATCTGCC      |
| P83  | 19P-49  | AAACACGCGTACAAAAGAAAACCTCAAGAAACGCAGCGTTTTCTGACGGTAC             |
| P84  | 19P-02  | GCTTGATGTGTCTTGACCATTTTCGTAAAGTAAATAAGATAAAAAGCTAGTAGCTGATG      |
| P85  | 19P-03  | ACTAGCTTTTATCTTATTTACTTTACGAAAATGGTGCAAGACACATCAAGCG             |
| P86  | 19P-04  | CTCCTAACTAAAACGTAAAGACTTCCCGTTTAGGATAGGCAATTACACACCCC            |
| P87  | 19P-05  | ACGGGAAGTCTTTACAGTTTTAGTTAGG                                     |
| P88  | 19P-06  | CTTGTGACTGACACTTTGG                                              |
| P89  | 19P-07  | GGGTCTCTACTTAATCTTCTGTACTCTGAAGAGG                               |
| P90  | 19P-08  | GTTGTAATCAAGAGGATGTCAGAATGCC                                     |
| P91  | 19P-09  | CAGGCAAATGGCATTCTGACATCCTCTTGATTACAACAAACCAACAATCTCAA            |
| P92  | 19P-10  | TCACTACATACATTTTAGTTATTCGCCAACATGTACCTATCACCAGAGAAGAAAG          |
| P93  | 19P-11  | GACATGTTGGCGAATAACTAAAATGTATGTAG                                 |
| P94  | 19P-12  | GAATAACTGTCGCCTCTTTTATCTGCC                                      |
| P95  | 19P-13  | AGTGCGGCAGATAAAAGAGGCGACAGTTATTCAACGAGACACTCTCCGTCAG             |
| P96  | 19P-14  | TGTGTTTGTGATAGATCTTGATATCAATG                                    |
| P97  | 19P-15  | CATTGATATACAAGATCTATCACAACACAATGCCTTCGCAAGTCATTCC                |
| P98  | 19P-16  | TTAGAAGTCTCAACAACATATCTAC                                        |
| P99  | 19P-17  | GTAGATTTGGCCACTAACGGGTTAG                                        |
| P100 | 19P-18  | CAGACACCAGGTCATTGAACTAACGACAAGGACGGGGTTCGTAAACTGGTTC             |
| P101 | 19P-53  | GTCCGTAGAAAACCTCAATCGGCTGCTCGCGACGGGGTTCGTAAACTGGTTC             |
| P102 | 19P-47  | AGGTATCAAAGCTGATTTTTATTTGCTATTGTTGATTTAC                         |
| P103 | 19P-48  | TTTCTTGAAGTTTTCTTTGTACGCGTGTGG                                   |
| P104 | 19P-51  | GCATGGTTATGGTGCCGGTTTGG                                          |
| P105 | 19P-52  | GCGAGCAGCCGATTGAAGTTTTCTA                                        |
| P106 | 19P-74  | AATGGAGTACTTCTGTCCATCGTTTCGCCGCGGTGTTGTAGTTTTAATATAGTTTGAGTATGAG |
| P107 | 19P-75  | AACGTCAAATCATAATCAGCACTATCTAGAGCACAAACGAAGGTCTCACTTAATC          |
| P108 | 19P-76  | TCGTTTCGTCTCACGGACTCATCAGTCTCATTTTGATTTGTTTAGGTAACCTGAACTG       |

|      |                 |                                                                                                           |
|------|-----------------|-----------------------------------------------------------------------------------------------------------|
| P109 | 19P-77          | ATGAGACTGATGAGTCCGTGAGGACGAAACGAGTAAGCTCGTCTCTCATGTAGACGACGACTGGTTTTAGAGCTAGAAAATAGCAAGTTAAAATAAG         |
| P110 | 19P-78          | TCGTTTCGTCTCACGGACTCATCAGCAAGCGTTTGATTTGTTTAGGTAACCTGAACTG                                                |
| P111 | 19P-79          | CGTTTGCTGATGAGTCCGTGAGGACGAAACGAGTAAGCTCGTCCAAGCGGAATCTCCTCAATGGTTTTAGAGCTAGAAAATAGCAAGTTAAAATAAG         |
| P112 | 19P-80          | TCGTTTCGTCTCACGGACTCATCAGGGTTTGTTTGATTTGTTTAGGTAACCTGAACTG                                                |
| P113 | 19P-81          | CAAACCCTGATGAGTCCGTGAGGACGAAACGAGTAAGCTCGTCGGTTTGATACTGTGACGTCGGTTTTAGAGCTAGAAAATAGCAAGTTAAAATAAG         |
| P114 | 19P-160         | TCGTTTCGTCTCACGGACTCATCAGGCATGCTTTGATTTGTTTAGGTAACCTGAACTG                                                |
| P115 | 19P-161         | GCATGCCTGATGAGTCCGTGAGGACGAAACGAGTAAGCTCGTCGCATGCCTGAGCTTTGAGGGGTTTTAGAGCTAGAAAATAGCAAGTTAAAATAAG         |
| P116 | FAA1UP-YZ-F     | CATGGCCCAACTGGTTACGAAGA                                                                                   |
| P117 | FAA1DN-YZ-R     | AGACCGTTTACAGCTAGACAAAATTTCAACA                                                                           |
| P118 | HTX1-Cas9-F     | GGAGTACTTCTTGTCCATCGTTTCGACTAGTTGTTGTAGTTTTAATATAGTTTGAGTATGAGATGGAACCTC                                  |
| P119 | AOX1t-Kpn-ARS-R | AAACGTCAAATCATAATCAGCACTAGGTACCGCACAAACGAACGTCTCACTTAATCTTC                                               |
| P120 | gPNSI-1R        | GTTTCGTCCTCACGGACTCATCAGGCTATCTTTGATTTGTTTAGGTAACCTGAACTGGATGTATTAGTTTGG                                  |
| P121 | gPNSI-1F        | GATAGCCTGATGAGTCCGTGAGGACGAAACGAGTAAGCTCGTCGCTATCGCCAACATCCAAGTGTTTTAGAGCTAGAAAATAGCAAGTTAAAATAAGG<br>CT  |
| P122 | gPNSI-2R        | GTTTCGTCCTCACGGACTCATCAGGGTTGGTTTGATTTGTTTAGGTAACCTGAACTGGATGTATTAGTTTGG                                  |
| P123 | gPNSI-2F        | CCAACCCTGATGAGTCCGTGAGGACGAAACGAGTAAGCTCGTCGGTTGGTACTATGTCCAACAGTTTTAGAGCTAGAAAATAGCAAGTTAAAATAAGG<br>CT  |
| P124 | gPNSI-3R        | GTTTCGTCCTCACGGACTCATCAGTGTGTCTTTGATTTGTTTAGGTAACCTGAACTGGATGTATTAGTTTGG                                  |
| P125 | gPNSI-3F        | GACACACTGATGAGTCCGTGAGGACGAAACGAGTAAGCTCGTCTGTGTCTTTGAAGCACACAGGTTTTAGAGCTAGAAAATAGCAAGTTAAAATAAGG<br>CT  |
| P126 | gPNSI-4R        | GTTTCGTCCTCACGGACTCATCAGTTGTGGTTTGATTTGTTTAGGTAACCTGAACTGGATGTATTAGTTTGG                                  |
| P127 | gPNSI-4F        | CCACAACCTGATGAGTCCGTGAGGACGAAACGAGTAAGCTCGTCTTGTGGCTATGGCTTGAATGGTTTTAGAGCTAGAAAATAGCAAGTTAAAATAAGG<br>CT |
| P128 | gPNSI-5R        | GTTTCGTCCTCACGGACTCATCAGCACGAGTTTGATTTGTTTAGGTAACCTGAACTGGATGTATTAGTTTGG                                  |
| P129 | gPNSI-5F        | CTCGTGCTGATGAGTCCGTGAGGACGAAACGAGTAAGCTCGTCCAGGAGCCGAGTAATAACCGTTTTAGAGCTAGAAAATAGCAAGTTAAAATAAG<br>GCT   |
| P130 | pCAI-gPNSI-1F   | GCTATCGCCAACATCCAAGTGTTTTAGAGCTAGAAAATAGCAAGTTAAAATAAGGCTAGT                                              |
| P131 | pCAI-gPNSI-1R   | ACTTGGATGTTGGCGATAGCGACGAGCTTACTCGTTTCGTCCT                                                               |
| P132 | pCAI-gPNSI-2F   | GGTTGGTACTATGTCCAACAGTTTTAGAGCTAGAAAATAGCAAGTTAAAATAAGGCTAGT                                              |

|      |               |                                                                      |
|------|---------------|----------------------------------------------------------------------|
| P133 | pCAI-gPNSI-2R | TGTTGGACATAGTACCAACCGACGAGCTTACTCGTTTCGTCCT                          |
| P134 | pCAI-gPNSI-3F | TGTGTCTTTGAAGCACACAGGTTTTAGAGCTAGAAATAGCAAGTTAAAATAAGGCTAGT          |
| P135 | pCAI-gPNSI-3R | CTGTGTGCTTCAAAGACACAGACGAGCTTACTCGTTTCGTCCT                          |
| P136 | pCAI-gPNSI-4F | TTGTGGCTATGGCTTGAATGGTTTTAGAGCTAGAAATAGCAAGTTAAAATAAGGCTAGT          |
| P137 | pCAI-gPNSI-4R | CATTCAAGCCATAGCCACAAGACGAGCTTACTCGTTTCGTCCT                          |
| P138 | pCAI-gPNSI-5F | CACGAGCCGAGTAATAACCGGTTTTAGAGCTAGAAATAGCAAGTTAAAATAAGGCTAGT          |
| P139 | pCAI-gPNSI-5R | CGGTTTACTCGGCTCGTGGACGAGCTTACTCGTTTCGTCCT                            |
| P140 | FAA1-HRUP-F   | AGGTATCAAAAGCTGATTTTTATTGCTATTGTTGATTAC                              |
| P141 | FAA1-HRUP-R   | CAATCGGCTGCTCGCTTTCTTGAAGTTTTCTTTGTACGCGTGTGTTG                      |
| P142 | FAA1-HRDN-F   | GAAAACCTCAAGAAAGCGAGCAGCCGATTGAAGTTTTCTA                             |
| P143 | FAA1-HRDN-R   | GCATGGTTATGGTGCCGTTTGG                                               |
| P144 | PNSI-1UP-F    | TATGGTTGCTTAAGATGATAGGAGAATCAAACC                                    |
| P145 | PNSI-1UP-R1   | GACGAGGACACCAAGACATTTCTACAAAAAGTCATATGACAAGTTGGGTAGGTTGC             |
| P146 | PNSI-1DN-F1   | ATAGGGATAATAGAAAAGTAAGGTTCCGCGAAGCAAGTTGGGACGCGGAC                   |
| P147 | PNSI-1DN-R    | ATCCAGTTGCTCCACCCCCC                                                 |
| P148 | PNSI-2UP-F    | CCATATAAGTGATGTCTTAACAGTTACCATAGTCAAA                                |
| P149 | PNSI-2UP-R1   | GACGAGGACACCAAGACATTTCTACAAAAAAGTAACAAAAAATGAAAAAATTAAGTTTGACACGGAC  |
| P150 | PNSI-2DN-F1   | ATAGGGATAATAGAAAAGTAAGGTTCCGCGTCTACGTTTTAAGATCAATCAAATCACTTTAGCTACAT |
| P151 | PNSI-2DN-R    | GAATTCTTTGACTATTTGGATAGCAAAGGAGG                                     |
| P152 | PNSI-3UP-F    | AATAAAAAATTCTCAGTCAGTGGCATGTGAAAG                                    |
| P153 | PNSI-3UP-R1   | GACGAGGACACCAAGACATTTCTACAAAAAAGGGGCAAAGACTGGCATAAGTA                |
| P154 | PNSI-3DN-F1   | ATAGGGATAATAGAAAAGTAAGGTTCCGCGGAATACAATGTGTAAAGTGCAAGTCTTTCT         |
| P155 | PNSI-3DN-R    | TTAAGGATTGATAACCAGATCGTTAAGCCAAATA                                   |
| P156 | PNSI-4UP-F    | TGTGAATCAGTCACTTTGCTATGGC                                            |
| P157 | PNSI-4UP-R1   | GACGAGGACACCAAGACATTTCTACAAAAACTCCTAGAACACCTAACATTGTATCACAA          |
| P158 | PNSI-4DN-F1   | ATAGGGATAATAGAAAAGTAAGGTTCCGCGCAGGACGAGATATCAAATAAAGGGCT             |
| P159 | PNSI-4DN-R    | TCTCTAAGAACGGTCCATGGCTCTC                                            |
| P160 | PNSI-5UP-F    | AGTGCCTCACAAAAAACGGGT                                                |
| P161 | PNSI-5UP-R1   | GACGAGGACACCAAGACATTTCTACAAAAAGCAACATGAAGTAAATAACCGAAACTCAA          |

|      |             |                                                                                                          |
|------|-------------|----------------------------------------------------------------------------------------------------------|
| P162 | PNSI-5DN-F1 | ATAGGGATAATAGAAAAGTAAGGTTCCGCGGGTAGGGCTGGTGACTAGCATG                                                     |
| P163 | PNSI-5DN-R  | AGTCGTGATCAGGCTTCACCGA                                                                                   |
| P164 | gPNSI-6F    | GGGGTCCTGATGAGTCCGTGAGGACGAAACGAGTAAGCTCGTACCCCGTAATAATCGACGTGTTTTAGAGCTAGAAATAGCAAGTTAAAATAAG<br>GCT    |
| P165 | gPNSI-6R    | GTTTCGTCCTCACGGACTCATCAGGACCCCTTTGATTTGTTTAGGTAACCTGAACTGGATGTATTAGTTTGG                                 |
| P166 | gPNSI-7F    | TTGCCACTGATGAGTCCGTGAGGACGAAACGAGTAAGCTCGTCTGGCAATAGGTAATTCAACGGTTTTAGAGCTAGAAATAGCAAGTTAAAATAAGG<br>CT  |
| P167 | gPNSI-7R    | GTTTCGTCCTCACGGACTCATCAGTGGCAATTTGATTTGTTTAGGTAACCTGAACTGGATGTATTAGTTTGG                                 |
| P168 | gPNSI-8F    | GGTCCCCTGATGAGTCCGTGAGGACGAAACGAGTAAGCTCGTCCGGACCGAGTAACAACCTCAAGTTTTAGAGCTAGAAATAGCAAGTTAAAATAAG<br>GCT |
| P169 | gPNSI-8R    | GTTTCGTCCTCACGGACTCATCAGGGGACCTTTGATTTGTTTAGGTAACCTGAACTGGATGTATTAGTTTGG                                 |
| P170 | gPNSI-9F    | CCAATTCTGATGAGTCCGTGAGGACGAAACGAGTAAGCTCGTCAATTGGTTATGTTAGCAAAGGTTTTAGAGCTAGAAATAGCAAGTTAAAATAAGG<br>CT  |
| P171 | gPNSI-9R    | GTTTCGTCCTCACGGACTCATCAGAATTGGTTTGATTTGTTTAGGTAACCTGAACTGGATGTATTAGTTTGG                                 |
| P172 | gPNSI-10F   | CAGAACCTGATGAGTCCGTGAGGACGAAACGAGTAAGCTCGTCTGTGACATAGTACCAGGTTTTAGAGCTAGAAATAGCAAGTTAAAATAAGG<br>CT      |
| P173 | gPNSI-10R   | GTTTCGTCCTCACGGACTCATCAGGTTCTGTTTGATTTGTTTAGGTAACCTGAACTGGATGTATTAGTTTGG                                 |
| P174 | gPNSI-11F   | GGGTTTCTGATGAGTCCGTGAGGACGAAACGAGTAAGCTCGTCAAACCCGAGAGGATGTACGGGTTTTAGAGCTAGAAATAGCAAGTTAAAATAAG<br>GCT  |
| P175 | gPNSI-11R   | GTTTCGTCCTCACGGACTCATCAGAAACCCTTTGATTTGTTTAGGTAACCTGAACTGGATGTATTAGTTTGG                                 |
| P176 | gPNSI-12F   | ATTTACCTGATGAGTCCGTGAGGACGAAACGAGTAAGCTCGTCTGTAATCTTCGGATATAGGGGTTTTAGAGCTAGAAATAGCAAGTTAAAATAAGG<br>CT  |
| P177 | gPNSI-12R   | GTTTCGTCCTCACGGACTCATCAGGTAATTTTGATTTGTTTAGGTAACCTGAACTGGATGTATTAGTTTGG                                  |
| P178 | gPNSI-13F   | TGGTTGCTGATGAGTCCGTGAGGACGAAACGAGTAAGCTCGTCCAACCGATAAAGACAGACGAGTTTTAGAGCTAGAAATAGCAAGTTAAAATAAG<br>GCT  |
| P179 | gPNSI-13R   | GTTTCGTCCTCACGGACTCATCAGCAACCATTTGATTTGTTTAGGTAACCTGAACTGGATGTATTAGTTTGG                                 |
| P180 | gPNSI-14F   | GCACACCTGATGAGTCCGTGAGGACGAAACGAGTAAGCTCGTCTGTGCTTTTGGTAAAGAGGGTTTTAGAGCTAGAAATAGCAAGTTAAAATAAG<br>GCT   |
| P181 | gPNSI-14R   | GTTTCGTCCTCACGGACTCATCAGGTGTGCTTTGATTTGTTTAGGTAACCTGAACTGGATGTATTAGTTTGG                                 |

|      |              |                                                                                                         |
|------|--------------|---------------------------------------------------------------------------------------------------------|
| P182 | gPNSI-15F    | TAAGATCTGATGAGTCCGTGAGGACGAAACGAGTAAGCTCGTCATCTTACCAACAGAAACAGGGTTTTAGAGCTAGAAATAGCAAGTTAAAATAAG<br>GCT |
| P183 | gPNSI-15R    | GTTTCGTCCTCACGGACTCATCAGATCTTATTTGATTTGTTTAGGTAACCTGAACTGGATGTATTAGTTTGG                                |
| P184 | gPNSI-16F    | GCTACTCTGATGAGTCCGTGAGGACGAAACGAGTAAGCTCGTCAGTAGCTTGAGAAGTGACGGGTTTTAGAGCTAGAAATAGCAAGTTAAAATAAG<br>GCT |
| P185 | gPNSI-16R    | GTTTCGTCCTCACGGACTCATCAGAGTAGCTTTGATTTGTTTAGGTAACCTGAACTGGATGTATTAGTTTGG                                |
| P186 | PNSI-6UP-F   | GTCAGGAGGGACGGTAGGTG                                                                                    |
| P187 | PNSI-6UP-R1  | GACGAGGACACCAAGACATTTCTACAAAAAAGTAGTCAACCTTGAGCTATTATTTCTT                                              |
| P188 | PNSI-6DN-F1  | ATAGGGATAATAGAAAAGTAAGGTTCCGCGAATTTCAAAGTTCAACTTCCGCACC                                                 |
| P189 | PNSI-6DN-R   | TTGTCAATCATGCTCTCAAGGACTACCA                                                                            |
| P190 | PNSI-7UP-F   | TAACTCATGGTAGTCCTTGAGAGCAT                                                                              |
| P191 | PNSI-7UP-R1  | GACGAGGACACCAAGACATTTCTACAAAAAATGGCTTCACTATCTAATTACGGCATG                                               |
| P192 | PNSI-7DN-F1  | ATAGGGATAATAGAAAAGTAAGGTTCCGCGATGCCGGAGATTCTCATTCTCAATG                                                 |
| P193 | PNSI-7DN-R   | AGAAGAAGTGAAGACAAAGGAAAGGGAAA                                                                           |
| P194 | PNSI-8UP-F   | TCCGCGATACAAGACGCCAAG                                                                                   |
| P195 | PNSI-8UP-R1  | GACGAGGACACCAAGACATTTCTACAAAAATTTTACAGCCAGCGACCAAAATATGCTA                                              |
| P196 | PNSI-8DN-F1  | ATAGGGATAATAGAAAAGTAAGGTTCCGCGTCAATGTTTTAATTTTTTTTTTTTCTTTCAATGCTC                                      |
| P197 | PNSI-8DN-R   | TAGCGGTTAAATACGAAGTTCAAGTACCAATT                                                                        |
| P198 | PNSI-9UP-F   | GTAATCTATTCAGGTCCGAAAGTTGAGAGC                                                                          |
| P199 | PNSI-9UP-R1  | GACGAGGACACCAAGACATTTCTACAAAAATAGCGTATATTGTGGTGAGAAACCTGGG                                              |
| P200 | PNSI-9DN-F1  | ATAGGGATAATAGAAAAGTAAGGTTCCGCGTACTGAGCAGAGTACTATGAGTATGCTT                                              |
| P201 | PNSI-9DN-R   | AGATTAATCGAAGGCCAATACTGCAAG                                                                             |
| P202 | PNSI-10UP-F  | ATGATAGTATGTGCTCATAAGATCCAACCTACG                                                                       |
| P203 | PNSI-10UP-R1 | GACGAGGACACCAAGACATTTCTACAAAAATAGGGGTTACAGTCCGAGTCGG                                                    |
| P204 | PNSI-10DN-F1 | ATAGGGATAATAGAAAAGTAAGGTTCCGCGTGTTCGAGATTTCTTCGGACTTTTGC                                                |
| P205 | PNSI-10DN-R  | CTATCCCTGAGTTTTTGAAGCAATAAACGAC                                                                         |
| P206 | PNSI-11UP-F  | AGTCGAAAACCTTTCTGCATTCTACTTGAT                                                                          |
| P207 | PNSI-11UP-R1 | GACGAGGACACCAAGACATTTCTACAAAAAGTCTCTGAATTTACAATTATACGATCGAG                                             |
| P208 | PNSI-11DN-F1 | ATAGGGATAATAGAAAAGTAAGGTTCCGCGCGTGGGTAGAGTTGTATGGCACAT                                                  |

|      |              |                                                             |
|------|--------------|-------------------------------------------------------------|
| P209 | PNSI-11DN-R  | GGAGATCCTCCCTAGCCTCTTGG                                     |
| P210 | PNSI-12UP-F  | AGTAGTAATACCTCCTTAAGATTGTTTTCAATCTGA                        |
| P211 | PNSI-12UP-R1 | GACGAGGACACCAAGACATTTCTACAAAACTGTATTTGTCTTAACAGTGAGTAGGTTT  |
| P212 | PNSI-12DN-F1 | ATAGGGATAATAGAAAAGTAAGGTTCCGCGACGCCAACTTAAGATCTGGTCTACC     |
| P213 | PNSI-12DN-R  | ACTGAGCGTTACCTAGTCTTTCCAAG                                  |
| P214 | PNSI-13UP-F  | ATAAACACTCAGATTGAAAACAATCTTAAGGAGGT                         |
| P215 | PNSI-13UP-R1 | GACGAGGACACCAAGACATTTCTACAAAAATCGCGAATTCGAATTTACCGATAAAAAGA |
| P216 | PNSI-13DN-F1 | ATAGGGATAATAGAAAAGTAAGGTTCCGCGGAAGGATGTAAGATGGGGATTCACTCACT |
| P217 | PNSI-13DN-R  | TTCAACGTCCATAAGTAACATTTTCATACCC                             |
| P218 | PNSI-14UP-F  | GTGAGCGTTTCGCTTGATGCAG                                      |
| P219 | PNSI-14UP-R1 | GACGAGGACACCAAGACATTTCTACAAAAAAGATACGGGCAATCTTATTAAGAGCAAA  |
| P220 | PNSI-14DN-F1 | ATAGGGATAATAGAAAAGTAAGGTTCCGCGACATTTCCAGAATGGTCACCACT       |
| P221 | PNSI-14DN-R  | TCGTCAATGTCAATAGAGGCGTTAAA                                  |
| P222 | PNSI-15UP-F  | CCAGAGTTTTGTAAATGTTGGGAATCTTG                               |
| P223 | PNSI-15UP-R1 | GACGAGGACACCAAGACATTTCTACAAAAATCTGTTGATCTTGGAGAAGTTCAGAGCT  |
| P224 | PNSI-15DN-F1 | ATAGGGATAATAGAAAAGTAAGGTTCCGCGCTCCAAGCTCTCAAGAAGGAGG        |
| P225 | PNSI-15DN-R  | GAGCTCTGAAGTTGATAAAATGGTCATAC                               |
| P226 | PNSI-16UP-F  | ACCTCCTCCAGTGGTAAAAAGGT                                     |
| P227 | PNSI-16UP-R1 | GACGAGGACACCAAGACATTTCTACAAAAATGTCAAATCATTCAATGGATTAGCCTCAC |
| P228 | PNSI-16DN-F1 | ATAGGGATAATAGAAAAGTAAGGTTCCGCGAAAGGATGGCAAAGAAATGTATGCTGAG  |
| P229 | PNSI-16DN-R  | CCACTTTTGGTAACCCAATACTTGATGC                                |
| P230 | YZ-I1-F      | TAACGACTGGACAATCACTTGTGAATGA                                |
| P231 | YZ-I1-R      | TGGCCTTACGAGTCTGATCAATGTAA                                  |
| P232 | YZ-I2-F      | ACATTGTAACAGGTTTGGCATCGT                                    |
| P233 | YZ-I2-R      | GTCACGATTGCTTGAGGATACTGAT                                   |
| P234 | YZ-I3-F      | GGATACTGTGACAGATGGTGAACAG                                   |
| P235 | YZ-I3-R      | GTTCTGAAAGTCGGAGGAAGAATAG                                   |
| P236 | YZ-I4-F      | CGTAATCGGACGGTAACGAACAT                                     |
| P237 | YZ-I4-R      | CCAGTCCAATCAAGAACTAAGAGAACTAA                               |



|      |                |                                                             |
|------|----------------|-------------------------------------------------------------|
| P238 | YZ-I5-F        | CGATGCTGAAGATCCGAAACCA                                      |
| P239 | YZ-I5-R        | GTGATGAACGTAATGCTGAGGGTG                                    |
| P240 | YZ-I6-F        | GAACCAGTCAATCCCAGTTTAGAGAT                                  |
| P241 | YZ-I6-R        | AGGCACCAGTTGGACTCACC                                        |
| P242 | YZ-I7-F        | CAATAAAAAGGGATCGTCAATGGTGT                                  |
| P243 | YZ-I7-R        | GTGATCTTCTCGTTGTTAGTCGTCG                                   |
| P244 | YZ-I8-F        | AATGCCAATTTCTTGAAGTCCATTCAA                                 |
| P245 | YZ-I8-R        | CGGTGGCGATCTAATTGTATTATAAATCG                               |
| P246 | YZ-I9-F        | CGTATCCCAACCTTGGTATGCCA                                     |
| P247 | YZ-I9-R        | GTTCTGGTGTGTTCCGAAAGC                                       |
| P248 | YZ-I10-F       | CAAGTTATCGAACCTGTATGTTGCAGT                                 |
| P249 | YZ-I10-R       | GAACAACGGGTCCTCCAAAGAT                                      |
| P250 | YZ-I11-F       | GCCAGAAGCGTTTTCAACTCATGT                                    |
| P251 | YZ-I11-R       | TGCCTCGAATACACCTTCAACAC                                     |
| P252 | YZ-I12-F       | TGGCTGTATACTGTCTGGATTCCAT                                   |
| P253 | YZ-I12-R       | CGTAGTCATTATCGTTACGAATTGTGG                                 |
| P254 | YZ-I13-F       | CGGATTGTTTTGCCCTATTAGTTGC                                   |
| P255 | YZ-I13-R       | AGAGCTAAGATGAACAAGGAACTAAGAG                                |
| P256 | YZ-I14-F       | CGTGTACCGTATGATTATCCGAACG                                   |
| P257 | YZ-I14-R       | CTCTTCTGGTGTGTTGAGCTCTCA                                    |
| P258 | YZ-I15-F       | CACAGCTAGTCTGGTAGTCAGGAG                                    |
| P259 | YZ-I15-R       | ACCTTGTCTTTGCAAGAACTGGG                                     |
| P260 | YZ-I16-F       | ATGACTATTAAGGCGGTGTACAGAAACC                                |
| P261 | YZ-I16-R       | GACTACCTAGTTTCAATATCGTTAGCTGG                               |
| P262 | pCAI-gPNSII-1F | TAAAGTAACAGAGCATCCTGGTTTTAGAGCTAGAAATAGCAAGTTAAAATAAGGCTAGT |
| P263 | pCAI-gPNSII-1R | CAGGATGCTCTGTTACTTTAGACGAGCTTACTCGTTTCGTCCT                 |
| P264 | pCAI-gPNSII-2F | TCATTGCTACTACTGAATGGGTTTTAGAGCTAGAAATAGCAAGTTAAAATAAGGCTAGT |
| P265 | pCAI-gPNSII-2R | CCATTGCTAGTAGCAATGAGACGAGCTTACTCGTTTCGTCCT                  |
| P266 | pCAI-gPNSII-3F | TATAAGGCTCTGTAGATGGGTTTTAGAGCTAGAAATAGCAAGTTAAAATAAGGCTAGT  |

|      |                |                                                                  |
|------|----------------|------------------------------------------------------------------|
| P267 | pCAI-gPNSII-3R | CCATCTACAAGAGCCTTATAGACGAGCTTACTCGTTTCGTCCT                      |
| P268 | pCAI-gPNSII-4F | CCTAAATACTACCTAAACAGGTTTTAGAGCTAGAAATAGCAAGTTAAAATAAGGCTAGT      |
| P269 | pCAI-gPNSII-4R | CTGTTTAGGTAGTATTTAGGGACGAGCTTACTCGTTTCGTCCT                      |
| P270 | pCAI-gPNSII-5F | AACTTTGAAACAAAAGAAGGGTTTTAGAGCTAGAAATAGCAAGTTAAAATAAGGCTAGT      |
| P271 | pCAI-gPNSII-5R | CCTTCTTTTGTTCAAAGTTGACGAGCTTACTCGTTTCGTCCT                       |
| P272 | pCAI-gPNSII-6F | CCAATATAGGATTGAACTCGGTTTTAGAGCTAGAAATAGCAAGTTAAAATAAGGCTAGT      |
| P273 | pCAI-gPNSII-6R | CGAGTTCAATCCTATATTGGGACGAGCTTACTCGTTTCGTCCT                      |
| P274 | pCAI-gPNSII-7F | AAGTCAATCATAACTACGGTTTTAGAGCTAGAAATAGCAAGTTAAAATAAGGCTAGT        |
| P275 | pCAI-gPNSII-7R | CGTAGTATTATGATTGACTTGACGAGCTTACTCGTTTCGTCCT                      |
| P276 | pCAI-gPNSII-8F | GTTACTGGATTAGAACGACGGTTTTAGAGCTAGAAATAGCAAGTTAAAATAAGGCTAGT      |
| P277 | pCAI-gPNSII-8R | CGTCGTTCTAATCCAGTAACGACGAGCTTACTCGTTTCGTCCT                      |
| P278 | pCAI-gPNSII-9F | GAACAATAACATGACCACAGTTTTAGAGCTAGAAATAGCAAGTTAAAATAAGGCTAGT       |
| P279 | pCAI-gPNSII-9R | TGTGGTCATGTTTATTGTTTCGACGAGCTTACTCGTTTCGTCCT                     |
| P280 | PNSII-1UP-F    | GTGAAGCTTTGAACTTGTCGATTCCACC                                     |
| P281 | PNSII-1UP-R1   | GACGAGGACACCAAGACATTTCTACAAAAACTATTATGGCTAGTGTATTTTGTATTTTGAAGCT |
| P282 | PNSII-1DN-F1   | CATAGGGATAATAGAAAAGTAAGGTTCCGCGTCAAACGGGAGCCCGATGGTG             |
| P283 | PNSII-1DN-R    | GGCCGTGGAACAAAATTATATGGATTATACAAAT                               |
| P284 | PNSII-2UP-F    | AGTCGATAAAACCAAAAACGATCTGATCAATAACT                              |
| P285 | PNSII-2UP-R1   | GACGAGGACACCAAGACATTTCTACAAAAAGCAAGGTCGGAGATTGCTTTTAAGC          |
| P286 | PNSII-2DN-F1   | ATAGGGATAATAGAAAAGTAAGGTTCCGCGTGCTGGTGGTTATATTACAAGCTTGGTAG      |
| P287 | PNSII-2DN-R    | CAATCGGTATTTAATTCATAGATATTC AATAACCAATTCTCCAC                    |
| P288 | PNSII-3UP-F    | TTTCAATTCCTTGAAAGCTTTAAAGTTGTTCTAATTTG                           |
| P289 | PNSII-3UP-R1   | GACGAGGACACCAAGACATTTCTACAAAAATCGACAAGCAGAACACTAAGATCTAGAGA      |
| P290 | PNSII-3DN-F1   | ATAGGGATAATAGAAAAGTAAGGTTCCGCGAATGCTAGCCTAGTTGTCAGAGCTT          |
| P291 | PNSII-3DN-R    | AATGCAGATTCTGAGACTACACAGATACTC                                   |
| P292 | PNSII-4UP-F    | GTGTTGCGGAGAACGAGATCTTTC                                         |
| P293 | PNSII-4UP-R1   | GACGAGGACACCAAGACATTTCTACAAAAATCGTGTGCGCGACAACACAGT              |
| P294 | PNSII-4DN-F1   | ATAGGGATAATAGAAAAGTAAGGTTCCGCGAATAGTAAGGACCGGGTTCAGTTGACT        |
| P295 | PNSII-4DN-R    | AATCTTCCGCACTCATTAGTTTTTATCTTTCTTCTT                             |

|      |              |                                                                        |
|------|--------------|------------------------------------------------------------------------|
| P296 | PNSII-5UP-F  | AGGCCAGACCTATAACCATCATGAAAAC                                           |
| P297 | PNSII-5UP-R1 | GACGAGGACACCAAGACATTTCTACAAAAAGCATGGACCTGCTTATCTCATCT                  |
| P298 | PNSII-5DN-F1 | ATAGGGATAATAGAAAAGTAAGGTTCCGCGAAGTAGTCATCTAATTTAATCATAAAAAGGGAAATCGAT  |
| P299 | PNSII-5DN-R  | TTGGTAAAAATTTGATATTGGTACTGGCTGTG                                       |
| P300 | PNSII-6UP-F  | AACTGACCATCTTCATCTATCAGCATACTT                                         |
| P301 | PNSII-6UP-R1 | GACGAGGACACCAAGACATTTCTACAAAAAAGTATTCCATAAACAGAAATTTTAAATAAAACAGTACACT |
| P302 | PNSII-6DN-F1 | TAGGGATAATAGAAAAGTAAGGTTCCGCGTGAAGCTTTACATGGTAAAGCATAGTGTAG            |
| P303 | PNSII-6DN-R  | GTTTCGTATTTGAAATGCTGACCCAGC                                            |
| P304 | PNSII-7UP-F  | ATCAATCGCTTTAAAATCACTTTTCATCTCTTGAAC                                   |
| P305 | PNSII-7UP-R1 | GACGAGGACACCAAGACATTTCTACAAAAACAAGGGTGTGATTTAACGGACTAAAAG              |
| P306 | PNSII-7DN-F1 | ATAGGGATAATAGAAAAGTAAGGTTCCGCGTTCTCCGGTGAAGAAGTGTGTAC                  |
| P307 | PNSII-7DN-R  | ATCAACTATTTAACCTTCTATCTGTTTCTATTATTTTCTACAT                            |
| P308 | PNSII-8UP-F  | CATGCATATAGTGTAGCCGAGACGAC                                             |
| P309 | PNSII-8UP-R1 | GACGAGGACACCAAGACATTTCTACAAAAAATTCGCAAGTTTCAGATTGCTTGC                 |
| P310 | PNSII-8DN-F1 | ATAGGGATAATAGAAAAGTAAGGTTCCGCGATCACGGATGTTGATTCCCCTAACATAG             |
| P311 | PNSII-8DN-R  | CGGATTAACGGGGTTGTATATATAGAGTTAAAAGATC                                  |
| P312 | PNSII-9UP-F  | GAACATCTCTGTGCCGACATTAACG                                              |
| P313 | PNSII-9UP-R1 | GACGAGGACACCAAGACATTTCTACAAAAATCGATTTAACCAAACCGTCTTGTCTG               |
| P314 | PNSII-9DN-F1 | ATAGGGATAATAGAAAAGTAAGGTTCCGCGACTTCATATCCAAATAAACTTTTGCGATTATCAATT     |
| P315 | PNSII-9DN-R  | CCGTAACACGGGATATATATTGTGTACAATTGAC                                     |
| P316 | PNSII-YZ-1F  | CAAAGCTCCCCTTGTTGCTAATCC                                               |
| P317 | PNSII-YZ-1R  | CTCGTCTTTCAAGACACCCGAAATTAG                                            |
| P318 | PNSII-YZ-2F  | CTACTATGCCGTATTGGAAAGGCGA                                              |
| P319 | PNSII-YZ-2R  | GAGTCATATTACGGTTTCAATTTCTGCTGT                                         |
| P320 | PNSII-YZ-3F  | CGTCTTGGACAACCTCATCAGAATCTTG                                           |
| P321 | PNSII-YZ-3R  | GCGTCACTGTAACATTATCAGTGTGG                                             |
| P322 | PNSII-YZ-4F  | GGGTCAAGTAGGGTGCAAACAAAG                                               |
| P323 | PNSII-YZ-4R  | GTGACATGAACTGACAAAGTAGGAAAGTG                                          |
| P324 | PNSII-YZ-5F  | CCAACAAAGATGGCTGTGGTCAC                                                |

|      |              |                                                             |
|------|--------------|-------------------------------------------------------------|
| P325 | PNSII-YZ-5R  | GTGCCTCGATGGTCAATTGTTTCTC                                   |
| P326 | PNSII-YZ-6F  | CAACTCTGAGCCACTCAAAGAATGCA                                  |
| P327 | PNSII-YZ-6R  | GGATCGTGTTCTCGCTGTTTTATTATCTAC                              |
| P328 | PNSII-YZ-7F  | GCTCCAACGGCATTGCAACA                                        |
| P329 | PNSII-YZ-7R  | GCACTGGATCAATTACCGTTGTTCC                                   |
| P330 | PNSII-YZ-8F  | CGGTTATCAAGAGAGGTTTGCAATTAG                                 |
| P331 | PNSII-YZ-8R  | GGATTTGTTCTGTGGAATCTGGATACAG                                |
| P332 | PNSII-YZ-9F  | ACGTGTGCTATGTGGCAATTATC                                     |
| P333 | PNSII-YZ-9R  | GGAGTGTCTCTCCTTATTGTTCTCGGA                                 |
| P334 | gPNSIII-1-F  | GGTCGATAGGATGATCACTTGTTTAGAGCTAGAAATAGCAAGTTAAAATAAGGCTAGT  |
| P335 | gPNSIII-1-R  | AAGTGATCATCCTATCGACCGACGAGCTTACTCGTTTCGTCCT                 |
| P336 | gPNSIII-2-F  | GCATTTTAAGAAAAACCTGGTTTTAGAGCTAGAAATAGCAAGTTAAAATAAGGCTAGT  |
| P337 | gPNSIII-2-R  | CAGGTTTTTCTTAAAATGCGACGAGCTTACTCGTTTCGTCCT                  |
| P338 | gPNSIII-3-F  | TGCTCGGATAGGGTCAAAGGTTTTAGAGCTAGAAATAGCAAGTTAAAATAAGGCTAGT  |
| P339 | gPNSIII-3-R  | CTTTGGACCCTATCCGAGCAGACGAGCTTACTCGTTTCGTCCT                 |
| P340 | gPNSIII-4-F  | GTATTTATTCCAGAACAAGGTTTTAGAGCTAGAAATAGCAAGTTAAAATAAGGCTAGT  |
| P341 | gPNSIII-4-R  | CCTTGTCTGGAATAAATACGACGAGCTTACTCGTTTCGTCCT                  |
| P342 | gPNSIII-5-F  | ATACTAGTTAACAACTGGGGTTTTAGAGCTAGAAATAGCAAGTTAAAATAAGGCTAGT  |
| P343 | gPNSIII-5-R  | CCCAGTTTGTTAACTAGTATGACGAGCTTACTCGTTTCGTCCT                 |
| P344 | gPNSIII-6-F  | CGGAGTTTAATAAAGCATGTGTTTTAGAGCTAGAAATAGCAAGTTAAAATAAGGCTAGT |
| P345 | gPNSIII-6-R  | ACATGCTTTATTAACTCCGGACGAGCTTACTCGTTTCGTCCT                  |
| P346 | gPNSIII-7-F  | TTGTGATCGATAATAAACGGGTTTTAGAGCTAGAAATAGCAAGTTAAAATAAGGCTAGT |
| P347 | gPNSIII-7-R  | CCGTTTATTATCGATCACAAGACGAGCTTACTCGTTTCGTCCT                 |
| P348 | gPNSIII-8-F  | AGTTAGGAGATATAGTAACGGTTTTAGAGCTAGAAATAGCAAGTTAAAATAAGGCTAGT |
| P349 | gPNSIII-8-R  | CGTACTATATCTCCTAACTGACGAGCTTACTCGTTTCGTCCT                  |
| P350 | gPNSIII-9-F  | GTTTGTACGCATGAGCTGTGTTTTAGAGCTAGAAATAGCAAGTTAAAATAAGGCTAGT  |
| P351 | gPNSIII-9-R  | CACAGCTCATGCGTACAAACGACGAGCTTACTCGTTTCGTCCT                 |
| P352 | gPNSIII-10-F | CGGCGAAAATTGGTAAACAGGTTTTAGAGCTAGAAATAGCAAGTTAAAATAAGGCTAGT |
| P353 | gPNSIII-10-R | CTGTTTACCAATTTTCGCCGACGAGCTTACTCGTTTCGTCCT                  |

|      |              |                                                             |
|------|--------------|-------------------------------------------------------------|
| P354 | gPNSIII-11-F | AGCTCTGAAGATACTACCGAGTTTTAGAGCTAGAAATAGCAAGTTAAAATAAGGCTAGT |
| P355 | gPNSIII-11-R | TCGGTAGTATCTTCAGAGCTGACGAGCTTACTCGTTTCGTCCT                 |
| P356 | gPNSIII-12-F | GGAACGAGGAGATAAATACGGTTTTAGAGCTAGAAATAGCAAGTTAAAATAAGGCTAGT |
| P357 | gPNSIII-12-R | CGTATTTATCTCCTCGTTCGACGAGCTTACTCGTTTCGTCCT                  |
| P358 | gPNSIV-1-F   | AATATGCACGAAATCAAGTGGTTTTAGAGCTAGAAATAGCAAGTTAAAATAAGGCTAGT |
| P359 | gPNSIV-1-R   | CAC TTGATTTCTGTCATATTGACGAGCTTACTCGTTTCGTCCT                |
| P360 | gPNSIV-2-F   | GTACAATCACTCGATACGTGTTTTAGAGCTAGAAATAGCAAGTTAAAATAAGGCTAGT  |
| P361 | gPNSIV-2-R   | ACGTATCGAGTGAATTGTACGACGAGCTTACTCGTTTCGTCCT                 |
| P362 | gPNSIV-3-F   | TTCCCTTCGGATACTACACTGTTTTAGAGCTAGAAATAGCAAGTTAAAATAAGGCTAGT |
| P363 | gPNSIV-3-R   | AGTGTAGTATCCGAAGGGAAGACGAGCTTACTCGTTTCGTCCT                 |
| P364 | gPNSIV-4-F   | TGTCAAATGAAAAAGATACGGTTTTAGAGCTAGAAATAGCAAGTTAAAATAAGGCTAGT |
| P365 | gPNSIV-4-R   | CGTATCTTTTTCATTTGACAGACGAGCTTACTCGTTTCGTCCT                 |
| P366 | gPNSIV-5-F   | CGTATGTTCTAAGATTACGAGTTTTAGAGCTAGAAATAGCAAGTTAAAATAAGGCTAGT |
| P367 | gPNSIV-5-R   | TCGTAATCTTAGAACATACGGACGAGCTTACTCGTTTCGTCCT                 |
| P368 | gPNSIV-6-F   | TGGTTGTATCAGTGAAATGGGTTTTAGAGCTAGAAATAGCAAGTTAAAATAAGGCTAGT |
| P369 | gPNSIV-6-R   | CCATTTCACTGATACAACCAGACGAGCTTACTCGTTTCGTCCT                 |
| P370 | gPNSIV-7-F   | TCTCGATGGACGGATAACAGGTTTTAGAGCTAGAAATAGCAAGTTAAAATAAGGCTAGT |
| P371 | gPNSIV-7-R   | CTGTTATCCGTCCATCGAGAGACGAGCTTACTCGTTTCGTCCT                 |
| P372 | gPNSIV-8-F   | CTCGAGTGCAAAATTAACCTGTTTTAGAGCTAGAAATAGCAAGTTAAAATAAGGCTAGT |
| P373 | gPNSIV-8-R   | AGGTTAATTTTGCCTCGAGGACGAGCTTACTCGTTTCGTCCT                  |
| P374 | gPNSIV-9-F   | ATTATCGTTTGGGATACGAGGTTTTAGAGCTAGAAATAGCAAGTTAAAATAAGGCTAGT |
| P375 | gPNSIV-9-R   | CTCGTATCCCAAACGATAATGACGAGCTTACTCGTTTCGTCCT                 |
| P376 | gPNSIV-10-F  | TACCAAGTTAATCAGCAGCGGTTTTAGAGCTAGAAATAGCAAGTTAAAATAAGGCTAGT |
| P377 | gPNSIV-10-R  | CGCTGCTGATTAACCTGGTAGACGAGCTTACTCGTTTCGTCCT                 |
| P378 | gPNSIV-11-F  | TATAAGTTGATCAAAACCTGGTTTTAGAGCTAGAAATAGCAAGTTAAAATAAGGCTAGT |
| P379 | gPNSIV-11-R  | CAGGTTTTGATCAACTTATAGACGAGCTTACTCGTTTCGTCCT                 |
| P380 | gPNSIV-12-F  | ACCATTAAGGATAACCAGGGGTTTTAGAGCTAGAAATAGCAAGTTAAAATAAGGCTAGT |
| P381 | gPNSIV-12-R  | CCCTGGTTATCCTTAATGGTGACGAGCTTACTCGTTTCGTCCT                 |
| P382 | gPNSIV-13-F  | TACTCTGAACAACAGCCAGGGTTTTAGAGCTAGAAATAGCAAGTTAAAATAAGGCTAGT |

|      |               |                                                                    |
|------|---------------|--------------------------------------------------------------------|
| P383 | gPNSIV-13-R   | CCTGGCTGTTGTTTCAGAGTAGACGAGCTTACTCGTTTCGTCCT                       |
| P384 | gPNSIV-14-F   | GCCAGAGAGTACCCAGCATGGTTTTAGAGCTAGAAAATAGCAAGTTAAAAAAGGCTAGT        |
| P385 | gPNSIV-14-R   | CATGCTGGGTACTCTCTGGCGACGAGCTTACTCGTTTCGTCCT                        |
| P386 | gPNSIV-15-F   | TATGAAAATCTATATCTAGGGTTTTAGAGCTAGAAAATAGCAAGTTAAAAAAGGCTAGT        |
| P387 | gPNSIV-15-R   | CCTAGATATAGATTTTCATAGACGAGCTTACTCGTTTCGTCCT                        |
| P388 | gPNSIV-16-F   | AGTATACGGTGAGTATTCGGGTTTTAGAGCTAGAAAATAGCAAGTTAAAAAAGGCTAGT        |
| P389 | gPNSIV-16-R   | CCGAATACTCACCGTATACTGACGAGCTTACTCGTTTCGTCCT                        |
| P390 | PNSIII-1UP-F  | TGCAAGGCCAGACCTGATG                                                |
| P391 | PNSIII-1UP-R1 | GACGAGGACACCAAGACATTTCTACAAAAACTACCCTTTGTTGAGTAACTTCAACACTG        |
| P392 | PNSIII-1DN-F1 | ATAGGGATAATAGAAAAGTAAGGTTCCGCGCAATTTAAATAGCCTTCATTTTGATACAGTGTCTGC |
| P393 | PNSIII-1DN-R  | CCACTCTTGACGATACGCATTCTACA                                         |
| P394 | PNSIII-2UP-F  | AGAGAACAAGAGGCAATAAGAGATCACTAAATG                                  |
| P395 | PNSIII-2UP-R1 | GACGAGGACACCAAGACATTTCTACAAAAACTATCGAACTACTTTGCGGACACTG            |
| P396 | PNSIII-2DN-F1 | ATAGGGATAATAGAAAAGTAAGGTTCCGCGCACTGGTTGCTCAAAAAGGGCTGA             |
| P397 | PNSIII-2DN-R  | GCTGCTTTGAAATGGAATCAAAGTAAACTCAA                                   |
| P398 | PNSIII-3UP-F  | CAAACAAGGCGTCAATTTTGAAAATAAATATTTTTG                               |
| P399 | PNSIII-3UP-R1 | GACGAGGACACCAAGACATTTCTACAAAAAGCGTTAAGCTCAGGTACGTCCAAA             |
| P400 | PNSIII-3DN-F1 | ATAGGGATAATAGAAAAGTAAGGTTCCGCGCTGTTGTTATTTGTGGAATAGTTTCATCAGCT     |
| P401 | PNSIII-3DN-R  | AAACAATCAGGGGTGACAGTTCAATCAA                                       |
| P402 | PNSIII-4UP-F  | TCTACAATCCAAAGAAATGTGGATTCCGTAGA                                   |
| P403 | PNSIII-4UP-R1 | GACGAGGACACCAAGACATTTCTACAAAAACAGTTCAAAGGAGACATCGTCCAATACAA        |
| P404 | PNSIII-4DN-F1 | ATAGGGATAATAGAAAAGTAAGGTTCCGCGCATCAGCAGCAACCAGCAAGT                |
| P405 | PNSIII-4DN-R  | TAACGTTCTCTCAGTTGAATCGAAATACTGA                                    |
| P406 | PNSIII-5UP-F  | GCGCTTGTAACGCTTTTCTTGATC                                           |
| P407 | PNSIII-5UP-R1 | GACGAGGACACCAAGACATTTCTACAAAAACTCTCAACCAGCAAATGATACTAGTAGTG        |
| P408 | PNSIII-5DN-F1 | ATAGGGATAATAGAAAAGTAAGGTTCCGCGATTAATAGAAATTAGATCTCGATAGGACGCGATC   |
| P409 | PNSIII-5DN-R  | TACAATTTGAGCGGATCATTGTTTCAGCTA                                     |
| P410 | PNSIII-6UP-F  | TTTTAAAAAAGTCGAAAGATAGGTTCTTTTTAACCACATCT                          |
| P411 | PNSIII-6UP-R1 | GACGAGGACACCAAGACATTTCTACAAAAATGAACTCAAAGACTATCACAAACAGTGTG        |

|      |                |                                                                         |
|------|----------------|-------------------------------------------------------------------------|
| P412 | PNSIII-6DN-F1  | ATAGGGATAATAGAAAAGTAAGGTTCCGCGAAAAAATTGTTCTGATGTGCAACACAAAC             |
| P413 | PNSIII-6DN-R   | ACTTGAGCTGTTCAAGCTCCCAG                                                 |
| P414 | PNSIII-7UP-F   | TAGGTCATGACTCAGAGACACAAGCG                                              |
| P415 | PNSIII-7UP-R1  | ACGAGGACACCAAGACATTTCTACAAAAAGGTTTAGAGTCTGAATCTGAATATGAAGG              |
| P416 | PNSIII-7DN-F1  | ATAGGGATAATAGAAAAGTAAGGTTCCGCGTAACTAGTGGTTATTGTTTCTGATATAATTAGTTTGACGTG |
| P417 | PNSIII-7DN-R   | GCAGGACCAGAGAATTTGGCTGT                                                 |
| P418 | PNSIII-8UP-F   | AGTTTACATTTTGAECTATATCTCTATCTGATTTGCTGAA                                |
| P419 | PNSIII-8UP-R1  | GACGAGGACACCAAGACATTTCTACAAAAAGCAGTAGAGTAATAAATTTTTGCGAACCCAG           |
| P420 | PNSIII-8DN-F1  | ATAGGGATAATAGAAAAGTAAGGTTCCGCGCGTTGGTTAGTATTGATGTGACCCATACT             |
| P421 | PNSIII-8DN-R   | AACTGCAACAATAATAAGCGTTTACCT                                             |
| P422 | PNSIII-9UP-F   | TTTTGTAAGCACTGACTTCTGTCTATTGGG                                          |
| P423 | PNSIII-9UP-R1  | GACGAGGACACCAAGACATTTCTACAAAAAATAGTATTGCATCTCAAGTCTCACGAAC              |
| P424 | PNSIII-9DN-F1  | ATAGGGATAATAGAAAAGTAAGGTTCCGCGAGAATGGAGACAGAGTCTGCGATGTAC               |
| P425 | PNSIII-9DN-R   | TAAAAGATGAGCAGGAACTCTTTCTTTTTTCCC                                       |
| P426 | PNSIII-10UP-F  | GCGAGGTTTATGTAACCACCACCC                                                |
| P427 | PNSIII-10UP-R1 | GACGAGGACACCAAGACATTTCTACAAAAACAGATGAGTCGGAATGTACCACGAC                 |
| P428 | PNSIII-10DN-F1 | ATAGGGATAATAGAAAAGTAAGGTTCCGCGTCTAATGGAGCGCCTTGGTTAAGTG                 |
| P429 | PNSIII-10DN-R  | CTACTTTGTTGAGCTTCTTTGTATAGTTTGATTACCT                                   |
| P430 | PNSIII-11UP-F  | CTTTTTCTTCGACAATGGATTGTACTTTTTTTCATC                                    |
| P431 | PNSIII-11UP-R1 | GACGAGGACACCAAGACATTTCTACAAAAATTTTTGTCAGTTATATTAGGTACCTTATAGGTGGCC      |
| P432 | PNSIII-11DN-F1 | ATAGGGATAATAGAAAAGTAAGGTTCCGCGCTCAACAAGAATGAGAAAATTATTTTAAATGGTTACGTC   |
| P433 | PNSIII-11DN-R  | TTTATCGAACATTGCCGAAGCTATGCC                                             |
| P434 | PNSIII-12UP-F  | GACGGTAGGTATCAGACCGACGA                                                 |
| P435 | PNSIII-12UP-R1 | GACGAGGACACCAAGACATTTCTACAAAAATTCATTTGCATCAACAAAAAACGTATTGATGC          |
| P436 | PNSIII-12DN-F1 | ATAGGGATAATAGAAAAGTAAGGTTCCGCGCCTACTATAATAAGAGAGTTTGGTTCTGGTTTTACTAGT   |
| P437 | PNSIII-12DN-R  | CTACGAGAAAACACTTCGAGATCCCTC                                             |
| P438 | YZ-PNSIII-1F   | CTCATCTACGCTTAATCCACATTCTGG                                             |
| P439 | YZ-PNSIII-1R   | GTCACTGTGAAGACAACAAGCATTAGTG                                            |
| P440 | YZ-PNSIII-2F   | AGCAGTCATCAAAAGAAGTCTTCTTGC                                             |

|      |               |                                                                         |
|------|---------------|-------------------------------------------------------------------------|
| P441 | YZ-PNSIII-2R  | GGATGGCACAATCAAATGATTCAGATG                                             |
| P442 | YZ-PNSIII-3F  | GCCTGAGCATACGATAGAGTTAAATTCG                                            |
| P443 | YZ-PNSIII-3R  | GAAGAGAAGCAAAGTCAGTACTCTACGG                                            |
| P444 | YZ-PNSIII-4F  | GGAGTCTTCTTGCCCGCTTGAATTAC                                              |
| P445 | YZ-PNSIII-4R  | TGTGAAAGACTGGTAGTTCGAAGTACTTAC                                          |
| P446 | YZ-PNSIII-5F  | CGTTCTTGCAAGCGCTGTTCTGA                                                 |
| P447 | YZ-PNSIII-5R  | CAAACAGGCTAGCTTTTTGCACTAGTAG                                            |
| P448 | YZ-PNSIII-6F  | TTGACCACAACAGTAAATTGGCAAGGA                                             |
| P449 | YZ-PNSIII-6R  | GAAAGAGTCAGAAATCCAAAAGAACACATAATTGAA                                    |
| P450 | YZ-PNSIII-7F  | GATTGGGGTACATTCTTCCCTGC                                                 |
| P451 | YZ-PNSIII-7R  | CTGTTTGCCATGACTGTGCAGAAA                                                |
| P452 | YZ-PNSIII-8F  | GCTGACAATAGAACAGCAATGTACTTTGTC                                          |
| P453 | YZ-PNSIII-8R  | GCGAACAATAAGCTGTGAAAGTAAAAGCAA                                          |
| P454 | YZ-PNSIII-9F  | GAGCTCGTCTGTTGACGAAAATGAG                                               |
| P455 | YZ-PNSIII-9R  | GACTTCATCAACAGATCGCACCAATACATA                                          |
| P456 | YZ-PNSIII-10F | CCATATTGGAGCACTTCCACAATTCC                                              |
| P457 | YZ-PNSIII-10R | GGAATAGATGCTTGGATGAAATGTTCAATTGG                                        |
| P458 | YZ-PNSIII-11F | CAACAGGAGAAATACTCGTTGTTTAGCAGA                                          |
| P459 | YZ-PNSIII-11R | GCTCCATGCTTTTGAGTTGTTGTACAAC                                            |
| P460 | YZ-PNSIII-12F | GGTTCTGCACTCCATGAGCTAAATCA                                              |
| P461 | YZ-PNSIII-12R | CCGCAACAGTAGAGAAACCAAATGG                                               |
| P462 | PNSIV-1UP-F   | TATAGCTGAGCAAATCACAACGAGCG                                              |
| P463 | PNSIV-1UP-R1  | GACGAGGACACCAAGACATTTCTACAAAAAACTAAGAATTATTTATGGTACTATCCTGTTTAGTCTATTCC |
| P464 | PNSIV-1DN-F1  | ATAGGGATAATAGAAAAGTAAGGTTCCGCGTTAAAACCAAATGTATGACCATCCTGCCA             |
| P465 | PNSIV-1DN-R   | ACAGTTCTTTCCGGTTCCTATTGAAAGC                                            |
| P466 | YZ-PNSIV1-F   | CTCATCGTTCAGAGCAGCAATGTG                                                |
| P467 | YZ-PNSIV1-R   | GAAAGTGTGCTACTGCTATTGTTGGC                                              |
| P468 | PNSIV-2UP-F   | AACAGACATTATTATCTCCATGAATCAGTATTCTTCG                                   |
| P469 | PNSIV-2UP-R1  | GACGAGGACACCAAGACATTTCTACAAAAACTATTGAGCAATTGAGTTGAAAAAATGAAAATTGC       |



|      |              |                                                                         |
|------|--------------|-------------------------------------------------------------------------|
| P470 | PNSIV-2DN-F1 | ATAGGGATAATAGAAAAGTAAGGTTCCGCGTGCGGATGGGACAAACCTTCTTATG                 |
| P471 | PNSIV-2DN-R  | TATCACTGCTATTTTCTGTTGTGTCGGGT                                           |
| P472 | YZ-PNSIV2-F  | CTCTTACTACATCATAAGCCTTTGCGAGC                                           |
| P473 | YZ-PNSIV2-R  | GCCTTCTCATCCAAATGATAAGCCAGG                                             |
| P474 | PNSIV-3UP-F  | GGTTGCATGCACCCACCGAA                                                    |
| P475 | PNSIV-3UP-R1 | GACGAGGACACCAAGACATTTCTACAAAAAACAATAATCGTGTGGCCTGCA                     |
| P476 | PNSIV-3DN-F1 | ATAGGGATAATAGAAAAGTAAGGTTCCGCGGAGAGTTTTGTTGATGCAACTGTCCTG               |
| P477 | PNSIV-3DN-R  | TTTACTGCCTGGGTTGTGTTGC                                                  |
| P478 | YZ-PNSIV3-F  | AGAAGGTGCGCGATAAAAAGCAA                                                 |
| P479 | YZ-PNSIV3-R  | GAGTGTTATTAGTGGTTGCGCATTG                                               |
| P480 | PNSIV-4UP-F  | TAATCTCCTCAAAAAGTGAAGGGAATGATTTAAATATTTGG                               |
| P481 | PNSIV-4UP-R1 | GACGAGGACACCAAGACATTTCTACAAAAACAGAGGATGAGACAAACAAAGACAAAGAC             |
| P482 | PNSIV-4DN-F1 | ATAGGGATAATAGAAAAGTAAGGTTCCGCGACGTCTATAACAGTTAGTTTTCAAAACATTCAAAAATATTT |
| P483 | PNSIV-4DN-R  | AGCAAGCTGATTGAACTCCGC                                                   |
| P484 | YZ-PNSIV4-F  | GAAGACGTTACCCAGGTGTCTATG                                                |
| P485 | YZ-PNSIV4-R  | GCCTAAGTTGCACAAGAAGTGACGTATA                                            |
| P486 | PNSIV-5UP-F  | CTTATTATTGCAATCTGAAAGTTAAGCCTAAGTC                                      |
| P487 | PNSIV-5UP-R1 | GACGAGGACACCAAGACATTTCTACAAAAAGGAGAGGGCAGGAGCAAAAA                      |
| P488 | PNSIV-5DN-F1 | TAGGGATAATAGAAAAGTAAGGTTCCGCGCTTTACTGGTAAACGATCTTCAAGTTGTCT             |
| P489 | PNSIV-5DN-R  | GATCGCCCTTGATGGAAAATTGAG                                                |
| P490 | YZ-PNSIV5-F  | CCTCCACCAACCACTGAGAAGC                                                  |
| P491 | YZ-PNSIV5-R  | GATGAATTGCAACGATAATCCGAGCAGTTTA                                         |
| P492 | PNSIV-6UP-F  | CTTAGAATCGGTGCCGTTTCATTTGG                                              |
| P493 | PNSIV-6UP-R1 | GACGAGGACACCAAGACATTTCTACAAAAACAGAAAATGGATTCTGCCAGAGACAATA              |
| P494 | PNSIV-6DN-F1 | ATAGGGATAATAGAAAAGTAAGGTTCCGCGTTTTGAAAAGAAACCTCCACGCGCA                 |
| P495 | PNSIV-6DN-R  | ATACCACCTTGATCGCCTAAGAACACTA                                            |
| P496 | YZ-PNSIV6-F  | CCCATGTTGGTGATACATTCAGTGC                                               |
| P497 | YZ-PNSIV6-R  | CGGATATATGAGGGGACAAGCGA                                                 |
| P498 | PNSIV-7UP-F  | TAGAGCCATTGCACCAGGGTCA                                                  |

|      |               |                                                                              |
|------|---------------|------------------------------------------------------------------------------|
| P499 | PNSIV-7UP-R1  | GACGAGGACACCAAGACATTTCTACAAAAATTTAGCATTTTATTGCGACTGAAAGCTTATTTTGT            |
| P500 | PNSIV-7DN-F1  | ATAGGGATAATAGAAAAGTAAGGTTCCGCGTGGATTTTTATCAGATTGATCAATCAAAAACGATAATATCAGTTAC |
| P501 | PNSIV-7DN-R   | TAGCGATCGCTGATGTAGAGAGGC                                                     |
| P502 | YZ-PNSIV7-F   | CAAAGTAATCTTGAGTCAAGTTGAAAAGTGAAC                                            |
| P503 | YZ-PNSIV7-R   | GTTGTATGGAGCGCCTTCCAGC                                                       |
| P504 | PNSIV-8UP-F   | TGTCAGTGGGGAATTTGCAGGTAGTAG                                                  |
| P505 | PNSIV-8UP-R1  | GACGAGGACACCAAGACATTTCTACAAAAACCTTCACTTCATGTAACATTTAGTCAAATTGAGG             |
| P506 | PNSIV-8DN-F1  | ATAGGGATAATAGAAAAGTAAGGTTCCGCGTTTATCCCAAAGTGTTTTGGTTGCAT                     |
| P507 | PNSIV-8DN-R   | TCAACAGAAAGGCTCCAGTTGG                                                       |
| P508 | YZ-PNSIV8-F   | ACCAGTCTTTGCTGGAGAATGGA                                                      |
| P509 | YZ-PNSIV8-R   | GTGCTCCTGGTTGGAAAATACAGGTAC                                                  |
| P510 | PNSIV-9UP-F   | TAAGAGCTCCACAATCGCCAAGC                                                      |
| P511 | PNSIV-9UP-R1  | GACGAGGACACCAAGACATTTCTACAAAAATTTTCAAGTTCTAGCGGAACTCTCTC                     |
| P512 | PNSIV-9DN-F1  | ATAGGGATAATAGAAAAGTAAGGTTCCGCGGCTCAAACAGGTTTATTCCATGGACC                     |
| P513 | PNSIV-9DN-R   | TACTAACTTATAGTGGATTGTGGTAGATACGTTACTATCT                                     |
| P514 | YZ-PNSIV9-F   | TCGTATCATAATGAAAACCTTATGTACCAAG                                              |
| P515 | YZ-PNSIV9-R   | AACACAGAACCATTTCATTCGCAAGATAGAA                                              |
| P516 | PNSIV-10UP-F  | GCCAGTGAGGCTCATACTTGGT                                                       |
| P517 | PNSIV-10UP-R1 | GACGAGGACACCAAGACATTTCTACAAAAAGCGGGTTTAAAAGACATAATAGGGT                      |
| P518 | PNSIV-10DN-F1 | ATAGGGATAATAGAAAAGTAAGGTTCCGCGATCAACTCACTATTTTATTTCATGTCAACAGC               |
| P519 | PNSIV-10DN-R  | ATCATTAAAAACTCAATTAAGTATTTTTCCCCACC                                          |
| P520 | YZ-PNSIV10-F  | GTCACCAACCATAGTTGGTTTAAATTTGAATACAAA                                         |
| P521 | YZ-PNSIV10-R  | CATTGAAACCGTTCGAACATACCTCG                                                   |
| P522 | PNSIV-11UP-F  | AGGCTTGCATCATCATTCTCGTAATC                                                   |
| P523 | PNSIV-11UP-R1 | GACGAGGACACCAAGACATTTCTACAAAAATCAGTAGGACTGTGCGTGTGTAGC                       |
| P524 | PNSIV-11DN-F1 | ATAGGGATAATAGAAAAGTAAGGTTCCGCGTTGCTAAAACATAAATGTTGTAGCCGTATATGATAAAACAG      |
| P525 | PNSIV-11DN-R  | GAAATTCGCAGCTATTTATTTCTACGGGG                                                |
| P526 | YZ-PNSIV11-F  | GAATTGACCTAAACGATCCAGAATTCAACG                                               |
| P527 | YZ-PNSIV11-R  | GAATTCAGTGCTCTTCAATCTTGATCTTG                                                |

|      |               |                                                                             |
|------|---------------|-----------------------------------------------------------------------------|
| P528 | PNSIV-12UP-F  | TATGATATTGAACGTCTTGAACGTACAGATGAG                                           |
| P529 | PNSIV-12UP-R1 | GACGAGGACACCAAGACATTTCTACAAAAATCCATATATTAATTATACATACTGTGCCCTTAAAATTA CTCTCG |
| P530 | PNSIV-12DN-F1 | ATAGGGATAATAGAAAAGTAAGGTTCCGCGTCTGTATTGTCCAAACATTGTTACTATCGTTTTTCTC         |
| P531 | PNSIV-12DN-R  | GATGAATGCTCATGGCTTGGTACC                                                    |
| P532 | YZ-PNSIV12-F  | GGGTCATATAATTGCCCGAAACAAGTC                                                 |
| P533 | YZ-PNSIV12-R  | CTTTCAGTTAAAGTTGAAGTTTGATCGGTGATAT                                          |
| P534 | PNSIV-13UP-F  | GGGGAAAAACAACACTACTATTAATGCAACT                                             |
| P535 | PNSIV-13UP-R1 | GACGAGGACACCAAGACATTTCTACAAAAAAGTAGGTGAAACTTTGTAGCTGCG                      |
| P536 | PNSIV-13DN-F1 | ATAGGGATAATAGAAAAGTAAGGTTCCGCGCCGAGCGTTGAAATTTGGAGTGG                       |
| P537 | PNSIV-13DN-R  | ATGCTCCTCATTCTAAGTTTCCGATGG                                                 |
| P538 | YZ-PNSIV13-F  | CGGGTGTGAGAAAGCAAAGTATTCTG                                                  |
| P539 | YZ-PNSIV13-R  | GCAAGAGTGACCGAGTCTACCC                                                      |
| P540 | PNSIV-14UP-F  | GGTAATCGGAATATTAAGATTCAACATAAAAGAAAGAACTAC                                  |
| P541 | PNSIV-14UP-R1 | GACGAGGACACCAAGACATTTCTACAAAAA CTACAATGAAGTTGGGAGTTTCATGACT                 |
| P542 | PNSIV-14DN-F1 | ATAGGGATAATAGAAAAGTAAGGTTCCGCGTTTAAAAACAGCTCTTTTGCAAGAGCCA                  |
| P543 | PNSIV-14DN-R  | GTGACTAATCTGTACTACCTCTGTATGTGTGG                                            |
| P544 | YZ-PNSIV14-F  | CTGAGACCATACCTGCATCAACTA                                                    |
| P545 | YZ-PNSIV14-R  | CGTCAGACTAATCAAGATAGGTCTTGCAAT                                              |
| P546 | PNSIV-15UP-F  | TAGGCTGACAACTCTTCTTTGAATATAAAATATTTTCCTAGT                                  |
| P547 | PNSIV-15UP-R1 | GACGAGGACACCAAGACATTTCTACAAAAATCTTGTTAGAAAAATTCAAACGATAGGATGAGGGA           |
| P548 | PNSIV-15DN-F1 | ATAGGGATAATAGAAAAGTAAGGTTCCGCGGCATAAAAAATTGTTGGTCTCTTATCAGATGACTC           |
| P549 | PNSIV-15DN-R  | CGGCTAAGACCATCCATCACCATAC                                                   |
| P550 | YZ-PNSIV15-F  | GCGTTTTCCAGCTCTGTATTCAAGTA                                                  |
| P551 | YZ-PNSIV15-R  | GCCAGTAGCTTCCAATCTAGTCCAAATTAT                                              |
| P552 | PNSIV-16UP-F  | AAATATTTTATATTTCAAAGAAGAGTTTGTCAGCCTACGAT                                   |
| P553 | PNSIV-16UP-R1 | GACGAGGACACCAAGACATTTCTACAAAAAGAGCTTGGGTCATGGGTAGATTA ACTC                  |
| P554 | PNSIV-16DN-F1 | ATAGGGATAATAGAAAAGTAAGGTTCCGCGCGCGCAAGTAGTTTCCTTCATTCC                      |
| P555 | PNSIV-16DN-R  | CAATGGACTCAATTAGGTATGTGCTATTCTAGC                                           |
| P556 | YZ-PNSIV16-F  | GCACGGATAAGTGGTTACATAAATTTTGG                                               |

P557 YZ-PNSIV16A-R GCATCCAGCATTAAAACTAAGTAAGTTCTGTTG

---

152

153

**Supplementary Table S3 Details of neutral sites and integration efficiency**

| No. | Neutral sites | sgRNA sequence (20 bp+NGG) | Plasmid                               | Host strain       | Integration efficiency        | Chromosome |
|-----|---------------|----------------------------|---------------------------------------|-------------------|-------------------------------|------------|
| 1   | PNSI-1        | GCTATCGCCAACATCCAAGTGGG    | pPICZ-Cas9-gPNSI-1 or<br>pCAI-gPNSI-1 | PC110 or<br>PC111 | 8/10 = 80% or<br>10/10 = 100% | chr1       |
| 2   | PNSI-2        | GGTTGGTACTATGTCCAACACGG    | pPICZ-Cas9-gPNSI-2                    | PC110             | 8/10 = 80%                    | chr1       |
| 3   | PNSI-3        | TGTGTCTTTGAAGCACACAGAGG    | pPICZ-Cas9-gPNSI-3 or<br>pCAI-gPNSI-3 | PC110 or<br>PC111 | 7/10 = 70% or<br>9/10 = 90%   | chr1       |
| 4   | PNSI-4        | TTGTGGCTATGGCTTGAATGAGG    | pPICZ-Cas9-gPNSI-4 or<br>pCAI-gPNSI-4 | PC110 or<br>PC111 | 9/10 = 90% or<br>10/10 = 100% | chr1       |
| 5   | PNSI-5        | CACGAGCCGAGTAATAACCGTGG    | pPICZ-Cas9-gPNSI-5 or<br>pCAI-gPNSI-5 | PC110 or<br>PC111 | 9/10 = 90% or<br>10/10 = 100% | chr1       |
| 6   | PNSI-6        | GACCCGTAATAATCGACGTCGG     | pPICZ-Cas9-gPNSI-6                    | PC110             | 10/10 = 100%                  | chr1       |
| 7   | PNSI-7        | TGGCAATAGGTAATTCAACGAGG    | pPICZ-Cas9-gPNSI-7                    | PC110             | 10/10 = 100%                  | chr1       |
| 8   | PNSI-8        | GGGACCGAGTAACAACCTCAAGGG   | pPICZ-Cas9-gPNSI-8                    | PC110             | 10/10 = 100%                  | chr1       |
| 9   | PNSI-9        | AATTGGTTATGTTAGCAAAGTGG    | pPICZ-Cas9-gPNSI-9                    | PC110             | 9/10 = 90%                    | chr1       |
| 10  | PNSI-10       | GTTCTGTGACATAGTACCAGGGG    | pPICZ-Cas9-gPNSI-10                   | PC110             | 10/10 = 100%                  | chr1       |
| 11  | PNSI-11       | AAACCCGAGAGGATGTACGGCGG    | pPICZ-Cas9-gPNSI-11                   | PC110             | 10/10 = 100%                  | chr1       |
| 12  | PNSI-12       | GTAAATCTTCGGATATAGGGGGG    | pPICZ-Cas9-gPNSI-12                   | PC110             | 10/10 = 100%                  | chr1       |
| 13  | PNSI-13       | CAACCAGTAAAGACAGACGACGG    | pPICZ-Cas9-gPNSI-13                   | PC110             | 9/10 = 90%                    | chr1       |
| 14  | PNSI-14       | GTGTGCTTTTGGTAAAGAGGTGG    | pPICZ-Cas9-gPNSI-14                   | PC110             | 9/10 = 90%                    | chr1       |
| 15  | PNSI-15       | ATCTTACCAACAGAAAACAGGAGG   | pPICZ-Cas9-gPNSI-15                   | PC110             | 0/10 = 0%                     | chr1       |
| 16  | PNSI-16       | AGTAGCTTGAGAAGTGACGGTGG    | pPICZ-Cas9-gPNSI-16                   | PC110             | 8/10 = 80%                    | chr1       |
| 17  | PNSII-1       | TAAAGTAACAGAGCATCCTGAGG    | pCAI-gPNSII-1                         | PC111             | 8/10 = 80%                    | chr2       |
| 18  | PNSII-2       | TCATTGCTACTACTGAATGGAGG    | pCAI-gPNSII-2                         | PC111             | 4/10 = 40%                    | chr2       |
| 19  | PNSII-3       | TATAAGGCTCTTGTAGATGGAGG    | pCAI-gPNSII-3                         | PC111             | 10/10 = 100%                  | chr2       |

|    |           |                         |                 |       |              |      |
|----|-----------|-------------------------|-----------------|-------|--------------|------|
| 20 | PNSII-4   | CCTAAATACTACCTAAACAGGGG | pCAI-gPNSII-4   | PC111 | 10/10 = 90%  | chr2 |
| 21 | PNSII-5   | AACTTTGAAACAAAAGAAGGAGG | pCAI-gPNSII-5   | PC111 | 8/10 = 80%   | chr2 |
| 22 | PNSII-6   | CCAATATAGGATTGAACTCGAGG | pCAI-gPNSII-6   | PC111 | 9/10 = 90%   | chr2 |
| 23 | PNSII-7   | AAGTCAATCATAACTACTCGGGG | pCAI-gPNSII-7   | PC111 | 10/10 = 100% | chr2 |
| 24 | PNSII-8   | GTTACTGGATTAGAACGACGAGG | pCAI-gPNSII-8   | PC111 | 10/10 = 100% | chr2 |
| 25 | PNSII-9   | GAACAATAAACATGACCACAGGG | pCAI-gPNSII-9   | PC111 | 9/10 = 90%   | chr2 |
| 26 | PNSIII-1  | GGTCGATAGGATGATCACTTCGG | pCAI-gPNSIII-1  | PC111 | 0/8 = 0%     | chr3 |
| 27 | PNSIII-2  | GCATTTTAAGAAAAACCTGCGG  | pCAI-gPNSIII-2  | PC111 | 2/8 = 25%    | chr3 |
| 28 | PNSIII-3  | TGCTCGGATAGGGTCCAAAGGGG | pCAI-gPNSIII-3  | PC111 | /            | chr3 |
| 29 | PNSIII-4  | GTATTTATCCAGAACAAGGCGG  | pCAI-gPNSIII-4  | PC111 | 7/8 = 87.5%  | chr3 |
| 30 | PNSIII-5  | ATACTAGTTAACAACTGGGCGG  | pCAI-gPNSIII-5  | PC111 | 7/8 = 87.5%  | chr3 |
| 31 | PNSIII-6  | CGGAGTTAATAAAGCATGTTCGG | pCAI-gPNSIII-6  | PC111 | 8/8 = 100%   | chr3 |
| 32 | PNSIII-7  | TTGTGATCGATAATAAACGGTGG | pCAI-gPNSIII-7  | PC111 | 8/8 = 100%   | chr3 |
| 33 | PNSIII-8  | AGTTAGGAGATATAGTAACGAGG | pCAI-gPNSIII-8  | PC111 | 8/8 = 100%   | chr3 |
| 34 | PNSIII-9  | GTTTGACGCATGAGCTGTTCGG  | pCAI-gPNSIII-9  | PC111 | /            | chr3 |
| 35 | PNSIII-10 | CGGCGAAAATTGGTAAACAGTGG | pCAI-gPNSIII-10 | PC111 | 6/8 = 75%    | chr3 |
| 36 | PNSIII-11 | AGCTCTGAAGATACTACCGAAGG | pCAI-gPNSIII-11 | PC111 | 8/8 = 100%   | chr3 |
| 37 | PNSIII-12 | GGAACGAGGAGATAAATACGTGG | pCAI-gPNSIII-12 | PC111 | 7/8 = 87.5%  | chr3 |
| 38 | PNSIV-1   | AATATGCACGAAATCAAGTGGGG | pCAI-gPNSIV-1   | PC111 | 0/8 = 0%     | chr4 |
| 39 | PNSIV-2   | GTACAATTCACTCGATACGTGGG | pCAI-gPNSIV-2   | PC111 | 8/8 = 100%   | chr4 |
| 40 | PNSIV-3   | TTCCCTTCGGATACTACACTAGG | pCAI-gPNSIV-3   | PC111 | 6/8 = 75%    | chr4 |
| 41 | PNSIV-4   | TGTCAAATGAAAAAGATACGGGG | pCAI-gPNSIV-4   | PC111 | 8/8 = 100%   | chr4 |
| 42 | PNSIV-5   | CGTATGTTCTAAGATTACGAGGG | pCAI-gPNSIV-5   | PC111 | 8/8 = 100%   | chr4 |
| 43 | PNSIV-6   | TGGTTGTATCAGTAAAATGGCGG | pCAI-gPNSIV-6   | PC111 | 8/8 = 100%   | chr4 |
| 44 | PNSIV-7   | TCTCGATGGACGGATAACAGAGG | pCAI-gPNSIV-7   | PC111 | 8/8 = 100%   | chr4 |
| 45 | PNSIV-8   | CTCGAGTGCAAAATTAACCTAGG | pCAI-gPNSIV-8   | PC111 | 8/8 = 100%   | chr4 |
| 46 | PNSIV-9   | ATTATCGTTTGGGATACGAGGGG | pCAI-gPNSIV-9   | PC111 | 8/8 = 100%   | chr4 |

|    |          |                         |                |       |             |      |
|----|----------|-------------------------|----------------|-------|-------------|------|
| 47 | PNSIV-10 | TACCAAGTTAATCAGCAGCGGGG | pCAI-gPNSIV-10 | PC111 | 8/8 = 100%  | chr4 |
| 48 | PNSIV-11 | TATAAGTTGATCAAAACCTGCGG | pCAI-gPNSIV-11 | PC111 | 8/8 = 100%  | chr4 |
| 49 | PNSIV-12 | ACCATTAAGGATAACCAGGGGGG | pCAI-gPNSIV-12 | PC111 | 8/8 = 100%  | chr4 |
| 50 | PNSIV-13 | TACTCTGAACAACAGCCAGGAGG | pCAI-gPNSIV-13 | PC111 | 8/8 = 100%  | chr4 |
| 51 | PNSIV-14 | GCCAGAGAGTACCCAGCATGCGG | pCAI-gPNSIV-14 | PC111 | 7/8 = 87.5% | chr4 |
| 52 | PNSIV-15 | TATGAAAATCTATATCTAGGAGG | pCAI-gPNSIV-15 | PC111 | 8/8 = 100%  | chr4 |
| 53 | PNSIV-16 | AGTATACGGTGAGTATTCGGGGG | pCAI-gPNSIV-16 | PC111 | 7/8 = 87.5% | chr4 |

---

155

156 **Supplementary Table S4 Production of fatty alcohol in Non-oleaginous yeast.**

| Host strain            | Gene                            | Genetic manipulation                                                                                                                                                                                                                                                                                                                                                                                                                                                                                                                                                                                                                 | Shake flask titer (mg/L) | Reference  |
|------------------------|---------------------------------|--------------------------------------------------------------------------------------------------------------------------------------------------------------------------------------------------------------------------------------------------------------------------------------------------------------------------------------------------------------------------------------------------------------------------------------------------------------------------------------------------------------------------------------------------------------------------------------------------------------------------------------|--------------------------|------------|
| <i>S. cerevisiae</i>   | <i>TaFAR1</i>                   | <i>dga1::HIS3</i> , pYES2- <i>P<sub>GAL1</sub>-TaFAR1</i> ,                                                                                                                                                                                                                                                                                                                                                                                                                                                                                                                                                                          | 73                       | 62         |
| <i>S. cerevisiae</i>   | <i>MmFAR1</i>                   | <i>acc1::P<sub>TEF1</sub>-ACC1</i> , <i>fas1::P<sub>TEF1</sub>-FAS1</i> , <i>fas2::P<sub>TEF1</sub>-FAS2</i> , pESC- <i>P<sub>GAL1</sub>-mFAR1/P<sub>GAL10</sub>-MaME</i>                                                                                                                                                                                                                                                                                                                                                                                                                                                            | 98                       | 63         |
| <i>S. cerevisiae</i>   | <i>MalFAR</i>                   | 4x <i>MalFAR</i> , <i>pex10Δ</i> , <i>hfd1Δ</i>                                                                                                                                                                                                                                                                                                                                                                                                                                                                                                                                                                                      | 105                      | 64         |
| <i>S. cerevisiae</i>   | <i>MmCAR</i> &<br><i>FaCoAR</i> | <i>hfd1Δ</i> , <i>pox1Δ</i> , <i>faa1Δ</i> , <i>faa4Δ</i> , <i>adh6Δ</i> , pYX212-( <i>P<sub>TPI1</sub>-npgA-T<sub>FBA1</sub></i> )+(P <sub>TDH3</sub> - <i>MmCAR-T<sub>ADH1</sub></i> )+(P <sub>TEF1</sub> - <i>FaCoAR-T<sub>pYX212</sub></i> )                                                                                                                                                                                                                                                                                                                                                                                     | 115                      | 14         |
| <i>S. cerevisiae</i>   | <i>MmCAR</i>                    | <i>pox1Δ</i> , <i>tpo1Δ</i> , <i>hfd1Δ</i> , <i>XI-3::P<sub>TEF1</sub>-eCAS9-T<sub>ADH1</sub></i> <i>XI2::P<sub>GAL1</sub>-AnACLα-T<sub>CYC1</sub>/P<sub>GAL10</sub>-AnACLB-T<sub>ADH1</sub></i> , <i>gal80Δ::P<sub>TDH3</sub>-RPS25Ai-FAS2(ACP-AcTesA, KS*)-T<sub>FBA1</sub></i> , <i>FAS1pΔ::P<sub>eTDH3</sub>-RPS25Ai</i> , <i>hfd1Δ::(P<sub>TPI1</sub>-MmACL-T<sub>FBA1</sub>)+(P<sub>TDH3</sub>-RtME-T<sub>CYC1</sub>)+(P<sub>tHXT7</sub>-MDH3-T<sub>TDH2</sub>)+(P<sub>PGK1</sub>-CTP1-T<sub>ADH1</sub>)</i> , pZW01-(P <sub>TDH3</sub> - <i>MmCAR*-T<sub>ADH1</sub></i> )+(P <sub>TPI1</sub> - <i>NpgA-T<sub>FBA1</sub></i> ) | 252                      | 65         |
| <i>S. cerevisiae</i>   | <i>TaFAR1</i>                   | <i>rpmΔ</i> , pRS425-(P <sub>TEF1</sub> - <i>TaFAR-T<sub>TEF1</sub></i> )-(P <sub>PGK1</sub> - <i>ACC1-T<sub>HXT7</sub></i> ), pRS423-(P <sub>TPI1</sub> - <i>YIACL1-T<sub>TPI1</sub></i> )-(P <sub>TEF1</sub> - <i>YIACL2-T<sub>TEF1</sub></i> )                                                                                                                                                                                                                                                                                                                                                                                    | 330.2                    | 66         |
| <i>S. cerevisiae</i>   | <i>MmFAR1</i>                   | 1622b::P <sub>GAL1</sub> - <i>MmFAR1-T<sub>TDH1</sub></i> , 208a::P <sub>TEF1</sub> - <i>MmFAR1-T<sub>CYC1</sub></i> , <i>YPRCd15c::P<sub>GAL1</sub>-ACC1**-T<sub>ENO2</sub></i> , <i>hfd1Δ</i> , <i>adh6Δ</i> , <i>gdh1Δ</i> , <i>dga1Δ</i> , 1014a::P <sub>TEF2</sub> - <i>OLE1-T<sub>ADH1</sub></i> , <i>gal801::P<sub>TDH3</sub>-GAL4</i>                                                                                                                                                                                                                                                                                        | 1200                     | 67         |
| <i>Pichia pastoris</i> | <i>FaCoAR</i>                   | <i>hfd1Δ</i> , <i>HIS4::P<sub>GAP</sub>-PpRAD52-T<sub>AOX1</sub></i> , <i>PNSI-2::P<sub>GAP</sub>-hCas9-T<sub>DAS1</sub></i> , <i>PNSI-4::P<sub>TPI1</sub>-SCADH5-T<sub>DAS2</sub></i> , <i>PNSI-5::P<sub>GAP</sub>-FaCoAR-T<sub>FBP1</sub></i>                                                                                                                                                                                                                                                                                                                                                                                      | 380                      | This study |

157
